# Supplementary material
Source: PubMed Central journal article supplement (PMC2757648)

**Meta-analysis of genome scans and replication identify *CD6*, *IRF8*, and *TNFRSF1A*  
as novel multiple sclerosis susceptibility loci**

**Supplementary Materials**

**Index**

- **Supplementary Tables (p.2)**
- **Supplementary Figures (p.33)**

## I. Supplementary Tables

**Supplementary Table 1a. Demographic profile of the MS subjects used in the meta-analysis**

| Subject Source                              | IMSGC      | IMSGC      | BWH       | Gene MSA   | Gene MSA   | Gene MSA  |
|---------------------------------------------|------------|------------|-----------|------------|------------|-----------|
| Analysis stratum                            | UK         | US         | US        | CH         | NL         | US        |
| <b>Number of Cases</b>                      | 453        | 342        | 860       | 230        | 253        | 486       |
| <b>Female:Male ratio</b>                    | 3.0:1.0    | 3.2:1.0    | 3.2:1.0   | 2.8:1.0    | 2.9:1.0    | 3.1:1.0   |
| <b>Mean Disease Duration, years (range)</b> | 11 (0-40)  | 16 (<1-36) | 14 (2-53) | 12 (<1-58) | 13 (<1-39) | 15 (1-59) |
| <b>Mean age at onset, years (range)</b>     | 27 (10-48) | 29 (11-50) | 33 (9-60) | 33 (8-59)  | 33 (13-71) | 33 (1-70) |
| <b>Disease course, n (%)</b>                |            |            |           |            |            |           |
| <b>“Bout onset”</b>                         | 421 (93%)  | 324 (95%)  | 824 (96%) | 183 (77%)  | 133 (84%)  | 470 (78%) |
| <b>Relapse Remitting</b>                    | 269 (59%)  | 255 (75%)  | 641 (75%) | 142 (60%)  | 111 (70%)  | 362 (60%) |
| <b>Secondary Progressive</b>                | 152 (34%)  | 69 (20%)   | 183 (21%) | 41 (17%)   | 22 (14%)   | 108 (18%) |
| <b>Primary Progressive</b>                  | 32 (7%)    | 17 (5%)    | 5 (1%)    | 22 (9%)    | 19 (12)    | 36 (6%)   |
| <b>Clinically Isolated Syndrome</b>         | 0          | 0          | 26 (3%)   | 26 (11%)   | 7 (4)      | 76 (13%)  |
| <b>Unknown</b>                              | 0          | 1 (<1%)    | 5 (1%)    | 7 (3%)     | 0          | 23 (4%)   |

Glossary: BWH = Brigham & Women’s Hospital, Boston; CH = Switzerland; NA = not available; NL = Netherlands; UK = United kingdom; US = United States. “Bout onset MS” is used here to describe subjects whose disease course started with discrete attacks of inflammatory demyelination. Each subject with MS is used only once in our analyses.

**Supplementary Table 1b. Demographic profile of subjects with MS used in the replication study**

| Analysis stratum                     | US               |            |           |           |      | UK              |         |
|--------------------------------------|------------------|------------|-----------|-----------|------|-----------------|---------|
|                                      | BWH              | WU         | ACP       | UCSF      | RUSH | UC              | 1958 BC |
| Number of controls                   | 407 <sup>1</sup> | 13         | 35        | 142       | 489  | -               | 1030    |
| Number of Cases                      | 227              | 152        | 597       | 407       | -    | 831             | -       |
| Female:Male ratio                    | 2.8:1.0          | 3.1:1.0    | 3.1:1.0   | 5.6:1.0   | -    | 2.28:1.0        | -       |
| Mean Disease Duration, years (range) | 12 (<1-58)       | 13 (<1-39) | 15 (1-56) | 12(<1-47) | -    | 14 (<1-54)      | -       |
| Mean age at onset, years (range)     | 33 (8-59)        | 33 (13-71) | 33 (1-70) | 42 (3-60) | -    | 32 (10-67)      | -       |
| Disease course, n (%)                |                  |            |           |           | -    |                 | -       |
| “Bout onset”                         | 178 (78%)        | 128 (84%)  | 463 (78%) | 345 (85%) | -    | 732 (88%)       | -       |
| Relapse Remitting                    | 136 (60%)        | 106 (70%)  | 358 (60%) | 237 (58%) | -    | NA <sup>2</sup> | -       |
| Secondary Progressive                | 42 (19%)         | 22 (14%)   | 105 (18%) | 111 (27%) | -    | NA <sup>2</sup> | -       |
| Primary Progressive                  | 17 (8%)          | 17 (11%)   | 36 (6%)   | 23 (6%)   | -    | 84 (10%)        | -       |
| Clinically Isolated Syndrome         | 25 (11%)         | 7 (4%)     | 75 (13%)  | 10 (2%)   | -    | 0 (0%)          | -       |
| Unknown                              | 7 (3%)           | 0          | 23 (4%)   | 26 (6%)   | -    | 15 (2%)         | -       |

<sup>1</sup> BWH controls – these subjects of European ancestry recruited in the Boston area include (1) unaffected spouses from our MS Genetics collections (n=14), (2) The BWH PhenoGenetic Project subjects (n=292), and healthy subjects from the HPCGG collection (n=101) (see methods for details). These subjects do not overlap with BWH control subjects used in the meta-analysis.

<sup>2</sup> NA – the breakdown of remitting relapsing and secondary progressive subjects is not available in this cohort.

Glossary: 1958 BC – 1958 birth cohort; ACP – Accelerated Cure Project; BWH – Brigham & Women’s Hospital; RUSH – RUSH University; UC – University of Cambridge, UK; UCSF – University California, San Francisco; UK – United Kingdom; US – United States; WU – Washington University, St. Louis

**Supplementary Table 1c. Demographic features of MS and CIS subjects involved in the analysis of RNA expression in PBMCs.**

|                                                          | <b>GA Treated subjects</b> | <b>IFN<math>\beta</math> treated subjects</b> | <b>Untreated subjects</b> |
|----------------------------------------------------------|----------------------------|-----------------------------------------------|---------------------------|
| <b>Female:Male ratio (n)</b>                             | 51:13                      | 69:25                                         | 73:9                      |
| <b>Self-declared European ancestry</b>                   | 100%                       | 100%                                          | 100%                      |
| <b>Mean disease duration at time of sampling (range)</b> | 6<br>(0-30)                | 8<br>(0-43)                                   | 8<br>(0-38)               |
| <b>Mean age at onset, years (range)</b>                  | 36<br>(17-57)              | 35<br>(17-56)                                 | 36<br>(17-63)             |
| <b>Disease course, n</b>                                 |                            |                                               |                           |
| <b>Relapse Remitting</b>                                 | 63                         | 93                                            | 74                        |
| <b>Clinically Isolated Syndrome</b>                      | 1                          | 1                                             | 8                         |

**Supplementary Table 2. SNPs included in the replication panel.**

| SNP        | CHR | BP        | MAF <sub>CEU</sub> | $P_{meta}$            | Genes                                  | Selection criterion |
|------------|-----|-----------|--------------------|-----------------------|----------------------------------------|---------------------|
| rs12025416 | 1   | 116750329 | 0.18               | $4.74 \times 10^{-8}$ | <i>CD58</i>                            | Top 100 loci        |
| rs1800693  | 12  | 6310270   | 0.48               | $7.52 \times 10^{-8}$ | <i>PLEKHG6, TNFRSF1A, SCNN1A, LTBR</i> | Top 100 loci        |
| rs9596270  | 13  | 49740441  | 0.04               | $8.26 \times 10^{-8}$ | NA                                     | Top 100 loci        |
| rs6896969  | 5   | 40460183  | 0.42               | $1.44 \times 10^{-7}$ | <i>PTGER4</i>                          | Top 100 loci        |
| rs17824933 | 11  | 60517188  | 0.19               | $2.32 \times 10^{-7}$ | <i>TMEM132A, SLC15A3, CD6</i>          | Top 100 loci        |
| rs1790100  | 12  | 122181605 | 0.20               | $2.74 \times 10^{-7}$ | <i>MPHOSPH9</i>                        | Top 100 loci        |
| rs10244467 | 7   | 22584456  | 0.05               | $3.37 \times 10^{-7}$ | <i>IL6, TOMM7</i>                      | Top 100 loci        |
| rs1356122  | 3   | 155666264 | 0.12               | $3.78 \times 10^{-7}$ | <i>GPR149</i>                          | Top 100 loci        |
| rs17086658 | 4   | 57010834  | 0.06               | $8.13 \times 10^{-7}$ | <i>KIAA1211, AASDH</i>                 | Top 100 loci        |
| rs11870121 | 17  | 71370533  | 0.23               | $8.55 \times 10^{-7}$ | NA                                     | Top 100 loci        |
| rs2104286  | 10  | 6139051   | 0.23               | $1.52 \times 10^{-6}$ | <i>IL2RA, RBM17</i>                    | Top 100 loci        |
| rs11230555 | 11  | 60519710  | 0.13               | $1.64 \times 10^{-6}$ | <i>TMEM132A, SLC15A3, CD6</i>          | Top 100 loci        |
| rs426921   | 18  | 63402133  | 0.16               | $1.71 \times 10^{-6}$ | NA                                     | Top 100 loci        |
| rs10802786 | 1   | 232026264 | 0.02               | $1.91 \times 10^{-6}$ | NA                                     | Top 100 loci        |
| rs10815231 | 9   | 547015    | 0.17               | $2.53 \times 10^{-6}$ | <i>KANK1</i>                           | Top 100 loci        |
| rs931555   | 5   | 35839334  | 0.23               | $2.73 \times 10^{-6}$ | <i>SPEF2, IL7R</i>                     | Top 100 loci        |
| rs9901869  | 17  | 42930205  | 0.49               | $2.85 \times 10^{-6}$ | <i>C17orf57, NPEPPS</i>                | Top 100 loci        |
| rs2853694  | 5   | 158681666 | 0.46               | $3.35 \times 10^{-6}$ | <i>UBLCP1, IL12B</i>                   | Top 100 loci        |
| rs2839578  | 21  | 43025706  | 0.39               | $3.49 \times 10^{-6}$ | <i>PDE9A</i>                           | Top 100 loci        |
| rs1017429  | 4   | 42954446  | 0.29               | $3.90 \times 10^{-6}$ | NA                                     | Top 100 loci        |
| rs4668993  | 2   | 15902899  | 0.36               | $5.13 \times 10^{-6}$ | NA                                     | Top 100 loci        |
| rs11772925 | 7   | 149865757 | 0.22               | $5.32 \times 10^{-6}$ | <i>GIMAP2, GIMAP1, GIMAP5</i>          | Top 100 loci        |
| rs11860603 | 16  | 11072518  | 0.21               | $5.62 \times 10^{-6}$ | <i>CLEC16A</i>                         | Top 100 loci        |
| rs11736632 | 4   | 57013263  | 0.04               | $5.67 \times 10^{-6}$ | <i>KIAA1211, AASDH</i>                 | Top 100 loci        |
| rs8023613  | 15  | 30739485  | 0.25               | $6.60 \times 10^{-6}$ | <i>ARHGAP11A, SCG5, GREM1</i>          | Top 100 loci        |
| rs1376041  | 16  | 56247384  | 0.28               | $7.25 \times 10^{-6}$ | <i>GPR56, GPR97, CCDC135</i>           | Top 100 loci        |
| rs1182580  | 1   | 104158803 | 0.48               | $7.62 \times 10^{-6}$ | NA                                     | Top 100 loci        |
| rs479505   | 10  | 97350709  | 0.11               | $8.25 \times 10^{-6}$ | <i>SORBS1, ALDH18A1</i>                | Top 100 loci        |

|            |    |           |      |                       |                                   |              |
|------------|----|-----------|------|-----------------------|-----------------------------------|--------------|
| rs201763   | 13 | 49917022  | 0.21 | 8.32x10 <sup>-6</sup> | NA                                | Top 100 loci |
| rs7814564  | 8  | 26835382  | 0.03 | 8.55x10 <sup>-6</sup> | ADRA1A                            | Top 100 loci |
| rs7517186  | 1  | 41573114  | 0.43 | 8.83x10 <sup>-6</sup> | EDN2                              | Top 100 loci |
| rs11667601 | 19 | 16531660  | 0.11 | 9.13x10 <sup>-6</sup> | C19orf44,CHERP,SLC35E1,MED26      | Top 100 loci |
| rs1250540  | 10 | 80706013  | 0.40 | 9.89x10 <sup>-6</sup> | ZMIZ1                             | Top 100 loci |
| rs11604291 | 11 | 72680764  | 0.02 | 1.02x10 <sup>-5</sup> | P2RY2,P2RY6,ARHGEF17              | Top 100 loci |
| rs10203141 | 2  | 179015804 | 0.43 | 1.04x10 <sup>-5</sup> | OSBPL6                            | Top 100 loci |
| rs6699421  | 1  | 143483220 | 0.13 | 1.06x10 <sup>-5</sup> | NA                                | Top 100 loci |
| rs10191601 | 2  | 204280876 | 0.37 | 1.08x10 <sup>-5</sup> | RAPH1                             | Top 100 loci |
| rs9924445  | 16 | 85304319  | 0.03 | 1.09x10 <sup>-5</sup> | NA                                | Top 100 loci |
| rs2293152  | 17 | 37735055  | 0.40 | 1.13x10 <sup>-5</sup> | STAT5B,STAT5A,STAT3               | Top 100 loci |
| rs1000361  | 3  | 27785323  | 0.38 | 1.26x10 <sup>-5</sup> | EOMES                             | Top 100 loci |
| rs2726453  | 4  | 106677440 | 0.45 | 1.28x10 <sup>-5</sup> | PPA2                              | Top 100 loci |
| rs1611927  | 8  | 4586651   | 0.19 | 1.36x10 <sup>-5</sup> | CSMD1                             | Top 100 loci |
| rs1035946  | 16 | 24881927  | 0.18 | 1.38x10 <sup>-5</sup> | SLC5A11,ARHGAP17                  | Top 100 loci |
| rs17581498 | 17 | 71305642  | 0.12 | 1.45x10 <sup>-5</sup> | ITGB4,GALK1,H3F3B,UNK,UNC13D,WBP2 | Top 100 loci |
| rs4737206  | 8  | 66292544  | 0.31 | 1.53x10 <sup>-5</sup> | NA                                | Top 100 loci |
| rs11023151 | 11 | 14202675  | 0.15 | 1.54x10 <sup>-5</sup> | SPON1,RRAS2                       | Top 100 loci |
| rs11256497 | 10 | 6127800   | 0.37 | 1.60x10 <sup>-5</sup> | IL2RA,RBM17                       | Top 100 loci |
| rs711663   | 3  | 4437774   | 0.02 | 1.63x10 <sup>-5</sup> | SUMF1                             | Top 100 loci |
| rs1658957  | 9  | 6662097   | 0.50 | 1.68x10 <sup>-5</sup> | GLDC                              | Top 100 loci |
| rs12300846 | 12 | 9634751   | 0.35 | 1.85x10 <sup>-5</sup> | KLRB1                             | Top 100 loci |
| rs254837   | 5  | 158615778 | 0.07 | 1.96x10 <sup>-5</sup> | RNF145,UBLCP1,IL12B               | Top 100 loci |
| rs13073434 | 3  | 155593744 | 0.04 | 2.02x10 <sup>-5</sup> | GPR149                            | Top 100 loci |
| rs6479810  | 10 | 63870066  | 0.15 | 2.26x10 <sup>-5</sup> | NA                                | Top 100 loci |
| rs16971851 | 15 | 31599801  | 0.27 | 2.32x10 <sup>-5</sup> | RYR3                              | Top 100 loci |
| rs17760402 | 18 | 53915666  | 0.03 | 2.38x10 <sup>-5</sup> | NEDD4L                            | Top 100 loci |
| rs11164814 | 1  | 92973394  | 0.23 | 2.44x10 <sup>-5</sup> | EVI5,RPL5,FAM69A                  | Top 100 loci |
| rs2357954  | 2  | 54274088  | 0.42 | 2.54x10 <sup>-5</sup> | ACYP2                             | Top 100 loci |
| rs7184083  | 16 | 11135415  | 0.40 | 2.64x10 <sup>-5</sup> | CLEC16A                           | Top 100 loci |
| rs7814314  | 8  | 136905069 | 0.25 | 2.79x10 <sup>-5</sup> | NA                                | Top 100 loci |

|            |    |           |      |                       |                                         |              |
|------------|----|-----------|------|-----------------------|-----------------------------------------|--------------|
| rs1193335  | 7  | 127210755 | 0.35 | 3.04x10 <sup>-5</sup> | <i>C7orf54,LRRRC4,SND1</i>              | Top 100 loci |
| rs17445836 | 16 | 84575164  | 0.27 | 3.05x10 <sup>-5</sup> | <i>IRF8</i>                             | Top 100 loci |
| rs10892613 | 11 | 120063294 | 0.14 | 3.06x10 <sup>-5</sup> | <i>GRIK4</i>                            | Top 100 loci |
| rs10148925 | 14 | 59157663  | 0.06 | 3.07x10 <sup>-5</sup> | <i>RTN1</i>                             | Top 100 loci |
| rs11811702 | 1  | 33019276  | 0.28 | 3.07x10 <sup>-5</sup> | <i>S100PBP,FNDC5,HPCA,TMEM54,RNF19B</i> | Top 100 loci |
| rs7089861  | 10 | 6150332   | 0.37 | 3.11x10 <sup>-5</sup> | <i>IL2RA,RBM17</i>                      | Top 100 loci |
| rs1420810  | 14 | 86572905  | 0.10 | 3.47x10 <sup>-5</sup> | NA                                      | Top 100 loci |
| rs10503052 | 18 | 57050613  | 0.32 | 3.50x10 <sup>-5</sup> | NA                                      | Top 100 loci |
| rs1193345  | 1  | 17659020  | 0.07 | 3.56x10 <sup>-5</sup> | <i>ARHGEF10L</i>                        | Top 100 loci |
| rs10775336 | 16 | 56103237  | 0.06 | 3.60x10 <sup>-5</sup> | <i>COQ9,POLR2C,DOK4,CCDC102A,GPR114</i> | Top 100 loci |
| rs4821818  | 22 | 37490539  | 0.12 | 3.61x10 <sup>-5</sup> | <i>GTPBP1,UNC84B,DNAL4,NPTXR</i>        | Top 100 loci |
| rs1862511  | 19 | 6537268   | 0.33 | 3.69x10 <sup>-5</sup> | <i>TNFSF9,CD70</i>                      | Top 100 loci |
| rs17179734 | 14 | 71670843  | 0.04 | 3.69x10 <sup>-5</sup> | <i>RGS6</i>                             | Top 100 loci |
| rs135382   | 22 | 47118481  | 0.16 | 3.73x10 <sup>-5</sup> | NA                                      | Top 100 loci |
| rs2214935  | 7  | 22068600  | 0.29 | 3.78x10 <sup>-5</sup> | <i>RAPGEF5</i>                          | Top 100 loci |
| rs1404773  | 2  | 215964838 | 0.18 | 3.81x10 <sup>-5</sup> | <i>ATIC</i>                             | Top 100 loci |
| rs11643026 | 16 | 62173482  | 0.03 | 3.88x10 <sup>-5</sup> | NA                                      | Top 100 loci |
| rs6583176  | 3  | 198013888 | 0.21 | 3.89x10 <sup>-5</sup> | <i>PAK2</i>                             | Top 100 loci |
| rs154929   | 18 | 56968545  | 0.33 | 3.91x10 <sup>-5</sup> | NA                                      | Top 100 loci |
| rs2492853  | 9  | 88061478  | 0.27 | 3.95x10 <sup>-5</sup> | NA                                      | Top 100 loci |
| rs11658169 | 17 | 19812514  | 0.40 | 3.99x10 <sup>-5</sup> | <i>AKAP10</i>                           | Top 100 loci |
| rs1519529  | 2  | 136807989 | 0.24 | 4.06x10 <sup>-5</sup> | NA                                      | Top 100 loci |
| rs4468527  | 14 | 51394881  | 0.07 | 4.09x10 <sup>-5</sup> | <i>GNG2</i>                             | Top 100 loci |
| rs7314705  | 12 | 30090640  | 0.08 | 4.10x10 <sup>-5</sup> | NA                                      | Top 100 loci |
| rs11580092 | 1  | 58546047  | 0.31 | 4.13x10 <sup>-5</sup> | NA                                      | Top 100 loci |
| rs4606981  | 2  | 133161908 | 0.25 | 4.14x10 <sup>-5</sup> | <i>GPR39</i>                            | Top 100 loci |
| rs17782451 | 16 | 87006977  | 0.03 | 4.16x10 <sup>-5</sup> | <i>ZFPM1</i>                            | Top 100 loci |
| rs158968   | 5  | 57977726  | 0.16 | 4.18x10 <sup>-5</sup> | <i>RAB3C</i>                            | Top 100 loci |
| rs395561   | 5  | 106889874 | 0.44 | 4.22x10 <sup>-5</sup> | <i>EFNA5</i>                            | Top 100 loci |
| rs16967121 | 15 | 36710299  | 0.08 | 4.26x10 <sup>-5</sup> | NA                                      | Top 100 loci |
| rs17280766 | 7  | 13410609  | 0.11 | 4.27x10 <sup>-5</sup> | NA                                      | Top 100 loci |

|            |    |             |      |                       |                                              |                |
|------------|----|-------------|------|-----------------------|----------------------------------------------|----------------|
| rs7622984  | 3  | 30183339    | 0.03 | 4.30x10 <sup>-5</sup> | NA                                           | Top 100 loci   |
| rs4976682  | 5  | 176658608   | 0.08 | 4.39x10 <sup>-5</sup> | <i>NSD1,RAB24,PRELID1,MXD3,LMAN2,RGS14</i>   | Top 100 loci   |
| rs6131888  | 20 | 16925054    | 0.38 | 4.43x10 <sup>-5</sup> | NA                                           | Top 100 loci   |
| rs741195   | 22 | 19318320    | 0.30 | 4.45x10 <sup>-5</sup> | <i>MED15</i>                                 | Top 100 loci   |
| rs12260682 | 10 | 126644390   | 0.05 | 4.54x10 <sup>-5</sup> | <i>ZRANB1,CTBP2</i>                          | Top 100 loci   |
| rs11704699 | 22 | 16144735    | 0.13 | 4.67x10 <sup>-5</sup> | NA                                           | Top 100 loci   |
| rs536858   | 1  | 66485047    | 0.37 | 4.67x10 <sup>-5</sup> | <i>PDE4B</i>                                 | Top 100 loci   |
| rs9940149  | 16 | 240642      | 0.19 | 4.88x10 <sup>-5</sup> | <i>LUC7L,ITFG3,RGS11,ARHGDIG,PDIA2,AXIN1</i> | Top 100 loci   |
| rs2022771  | 14 | 85999679    | 0.42 | 4.89x10 <sup>-5</sup> | NA                                           | Top 100 loci   |
| rs9380353  | 6  | 4.9358023   | 0.01 | 7.98x10 <sup>-7</sup> | <i>SYNGAP1</i>                               | candidate gene |
| rs892999   | 6  | 4.53196386  | 0.10 | 5.84x10 <sup>-6</sup> | <i>TNFAIP3</i>                               | candidate gene |
| rs4149576  | 12 | -4.53201476 | 0.50 | 5.84x10 <sup>-6</sup> | <i>PLEKHG6,TNFRSF1A,SCNN1A,LTBR</i>          | candidate gene |
| rs4239162  | 17 | 4.46025727  | 0.49 | 8.19x10 <sup>-6</sup> | <i>TBX21</i>                                 | candidate gene |
| rs12490899 | 3  | -4.02659066 | 0.05 | 5.66x10 <sup>-5</sup> | <i>TGFBR2</i>                                | candidate gene |
| rs4680534  | 3  | 3.9832558   | 0.26 | 6.80x10 <sup>-5</sup> | <i>IL12A</i>                                 | candidate gene |
| rs9621545  | 22 | 3.91774763  | 0.16 | 8.94x10 <sup>-5</sup> | <i>SYN3</i>                                  | candidate gene |
| rs6910219  | 6  | -3.89874907 | 0.13 | 9.67x10 <sup>-5</sup> | <i>SYNGAP1</i>                               | candidate gene |
| rs2760524  | 1  | -3.8745058  | 0.19 | 0.000107              | <i>RGS1</i>                                  | candidate gene |
| rs1401884  | 16 | 3.85832945  | 0.25 | 0.000114              | <i>IRF8</i>                                  | candidate gene |
| rs187084   | 3  | -3.84741066 | 0.31 | 0.000119              | <i>TLR9</i>                                  | candidate gene |
| rs3806680  | 3  | -3.83709057 | 0.26 | 0.000125              | <i>IL5RA</i>                                 | candidate gene |
| rs6926566  | 6  | -3.80337239 | 0.49 | 0.000143              | <i>FYN</i>                                   | candidate gene |
| rs13022141 | 2  | 3.7757472   | 0.22 | 0.000160              | <i>CXCR4</i>                                 | candidate gene |
| rs6732091  | 2  | -3.75454028 | 0.39 | 0.000174              | <i>CD28</i>                                  | candidate gene |
| rs11165441 | 1  | -3.68849054 | 0.17 | 0.000226              | <i>TGFBR3</i>                                | candidate gene |
| rs12042693 | 1  | 3.65037616  | 0.07 | 0.000262              | <i>CD247</i>                                 | candidate gene |
| rs352074   | 6  | 3.62046123  | 0.19 | 0.000294              | <i>MARCKS</i>                                | candidate gene |
| rs4678000  | 3  | -3.59664401 | 0.35 | 0.000322              | <i>CD86</i>                                  | candidate gene |
| rs7232625  | 18 | -3.56942573 | 0.23 | 0.000358              | <i>BCL2</i>                                  | candidate gene |
| rs17066096 | 6  | -3.54356096 | 0.16 | 0.000395              | <i>IL22RA2</i>                               | candidate gene |
| rs1699105  | 11 | 3.53205875  | 0.47 | 0.000412              | <i>SORL1</i>                                 | candidate gene |



|            |    |             |      |                         |                                                  |                    |
|------------|----|-------------|------|-------------------------|--------------------------------------------------|--------------------|
| rs7132171  | 12 | -3.51655461 | 0.43 | 0.000437                | <i>LRRK2</i>                                     | candidate gene     |
| rs17239559 | 19 | 3.51637621  | 0.36 | 0.000437                | <i>LILRB3,LILRA6,LILRB5</i>                      | candidate gene     |
| rs2832359  | 21 | 3.42082542  | 0.11 | 0.000624                | <i>GRIK1</i>                                     | candidate gene     |
| rs10758669 | 9  | 3.41947965  | 0.31 | 0.000627                | <i>JAK2</i>                                      | candidate gene     |
| rs9347662  | 6  | 3.39209523  | 0.18 | 0.000694                | <i>PARK2</i>                                     | candidate gene     |
| rs12913890 | 15 | -3.32848956 | 0.50 | 0.000873                | <i>RORA</i>                                      | candidate gene     |
| rs11088251 | 21 | 3.32481796  | 0.19 | 0.000885                | <i>IFNAR1,IFNGR2</i>                             | candidate gene     |
| rs12669882 | 7  | 3.31232375  | 0.04 | 0.000925                | <i>DNAJB6</i>                                    | candidate gene     |
| rs9321619  | 6  | -3.30980717 | 0.40 | 0.000934                | <i>OLIG3</i>                                     | candidate gene     |
| rs2834044  | 21 | -3.30486051 | 0.26 | 0.000950                | <i>OLIG2</i>                                     | candidate gene     |
| rs2083914  | 8  | 6289562     | 0.18 | 0.00266                 | <i>ANGPT2,MCPH1</i>                              | nscSNP             |
| rs2303759  | 19 | 54560863    | 0.31 | 0.00273                 | <i>SLC6A16,CD37,TEAD2,DKKL1,FLJ32658,PTH2</i>    | nscSNP             |
| rs11640138 | 16 | 11270230    | 0.34 | 0.00423                 | <i>SOCS1,TNP2,PRM3,PRM2,PRM1</i>                 | nscSNP             |
| rs2236293  | 9  | 35831783    | 0.38 | 0.00513                 | <i>NPR2,SPAG8,HINT2,C9orf128,C9orf127,OR13J1</i> | nscSNP             |
| rs6571751  | 14 | 20840570    | 0.43 | 0.00572                 | <i>HNRNPC,RPGRI1,SUPT16H</i>                     | nscSNP             |
| rs3816800  | 15 | 23476187    | 0.41 | 0.00684                 | <i>ATP10A</i>                                    | nscSNP             |
| rs3814281  | 15 | 81296820    | 0.15 | 0.00801                 | <i>FSD2,WHDC1,HOMER2</i>                         | nscSNP             |
| rs4792311  | 17 | 12855734    | 0.33 | 0.00867                 | <i>RICH2,ELAC2</i>                               | nscSNP             |
| rs3135388  | 6  | 32521029    | 0.25 | 7.44x10 <sup>-164</sup> | <i>HLA DRB1*1501</i>                             | Known locus        |
| rs2743951  | 6  | 29817213    | 0.50 | 7.38x10 <sup>-11</sup>  | <i>HLA B*4402</i>                                | Known locus        |
| rs2300747  | 1  | 116905738   | 0.13 | 2.44x10 <sup>-7</sup>   | <i>CD58</i>                                      | Known locus        |
| rs6897932  | 5  | 35910332    | 0.24 | 7.71x10 <sup>-6</sup>   | <i>IL7R</i>                                      | Known locus        |
| rs12708716 | 16 | 11087374    | 0.29 | 0.000170                | <i>CLEC16A</i>                                   | Known locus        |
| rs10735781 | 1  | 92893695    | 0.33 | 0.00192                 | <i>EVI5</i>                                      | Known locus        |
| rs763361   | 18 | 65682622    | 0.48 | 0.157                   | <i>CD226</i>                                     | Known locus        |
| rs2049114  | 12 | 122182218   | 0.21 | 1.30x10 <sup>-7</sup>   | <i>MPHOSPH9</i>                                  | Secondary Analysis |
| rs17765606 | 16 | 64540948    | 0.04 | 5.20x10 <sup>-7</sup>   | NA                                               | Secondary Analysis |
| rs4368946  | 8  | 98497864    | 0.06 | 2.90x10 <sup>-6</sup>   | NA                                               | Secondary Analysis |
| rs882300   | 2  | 136809987   | 0.48 | 8.30x10 <sup>-6</sup>   | <i>CXCR4</i>                                     | Secondary Analysis |
| rs918434   | 19 | 52452069    | 0.38 | 1.10x10 <sup>-5</sup>   | <i>SAE1,BBC3,CCDC9,C5AR1</i>                     | Secondary Analysis |
| rs7217180  | 17 | 54979905    | 0.18 | 1.10x10 <sup>-5</sup>   | <i>DHX40</i>                                     | Secondary Analysis |

|            |    |           |      |                       |                                      |                    |
|------------|----|-----------|------|-----------------------|--------------------------------------|--------------------|
| rs13251655 | 8  | 119829740 | 0.21 | 1.10x10 <sup>-5</sup> | NA                                   | Secondary Analysis |
| rs4668486  | 2  | 16193790  | 0.22 | 1.20x10 <sup>-5</sup> | NA                                   | Secondary Analysis |
| rs750780   | 11 | 33874170  | 0.17 | 1.20x10 <sup>-5</sup> | LMO2                                 | Secondary Analysis |
| rs11865121 | 16 | 11074189  | 0.22 | 1.30x10 <sup>-5</sup> | CLEC16A                              | Secondary Analysis |
| rs6691787  | 1  | 68118647  | 0.23 | 1.30x10 <sup>-5</sup> | NA                                   | Secondary Analysis |
| rs2304494  | 17 | 37216477  | 0.09 | 1.60x10 <sup>-5</sup> | JUP,SC65,FKBP10,NT5C3L,KLHL10,KLHL11 | Secondary Analysis |
| rs7137953  | 12 | 119357405 | 0.13 | 1.60x10 <sup>-5</sup> | COX6A1,TRIAP1,GATC,SFRS9,DYNLL1,COQ5 | Secondary Analysis |
| rs12999011 | 2  | 190330293 | 0.16 | 1.60x10 <sup>-5</sup> | SLC40A1,ASNSD1,ANKAR                 | Secondary Analysis |
| rs10454951 | 5  | 6305863   | 0.05 | 1.70x10 <sup>-5</sup> | FLJ33360                             | Secondary Analysis |
| rs2325566  | 13 | 73281941  | 0.25 | 1.70x10 <sup>-5</sup> | KLF12                                | Secondary Analysis |
| rs12419184 | 11 | 125561518 | 0.13 | 1.70x10 <sup>-5</sup> | RPUSD4,FAM118B                       | Secondary Analysis |
| rs10507622 | 13 | 58443686  | 0.03 | 1.80x10 <sup>-5</sup> | NA                                   | Secondary Analysis |
| rs10885868 | 10 | 117912102 | 0.33 | 1.80x10 <sup>-5</sup> | GFRA1                                | Secondary Analysis |
| rs6973638  | 7  | 15170510  | 0.40 | 1.90x10 <sup>-5</sup> | TMEM195                              | Secondary Analysis |
| rs820240   | 17 | 71094622  | 0.15 | 1.90x10 <sup>-5</sup> | LLGL2,RECQL5                         | Secondary Analysis |
| rs17304143 | 15 | 60364343  | 0.10 | 2.10x10 <sup>-5</sup> | NA                                   | Secondary Analysis |
| rs1294012  | 1  | 9219447   | 0.03 | 2.20x10 <sup>-5</sup> | H6PD                                 | Secondary Analysis |
| rs7349811  | 5  | 96513963  | 0.48 | 2.20x10 <sup>-5</sup> | NA                                   | Secondary Analysis |
| rs2277136  | 8  | 6322616   | 0.16 | 2.40x10 <sup>-5</sup> | ANGPT2,MCPH1                         | Secondary Analysis |
| rs251921   | 16 | 13110329  | 0.45 | 2.40x10 <sup>-5</sup> | NA                                   | Secondary Analysis |
| rs1582844  | 2  | 153592544 | 0.02 | 2.40x10 <sup>-5</sup> | NA                                   | Secondary Analysis |
| rs2760524  | 1  | 189262205 | 0.19 | 2.40x10 <sup>-5</sup> | RGS1                                 | Secondary Analysis |
| rs927544   | 13 | 46354052  | 0.24 | 2.50x10 <sup>-5</sup> | HTR2A                                | Secondary Analysis |
| rs17346755 | 5  | 58000989  | 0.13 | 2.50x10 <sup>-5</sup> | RAB3C                                | Secondary Analysis |
| rs7311897  | 12 | 8911595   | 0.08 | 2.80x10 <sup>-5</sup> | A2ML1,PHC1                           | Secondary Analysis |
| rs1880719  | 4  | 83974614  | 0.38 | 2.90x10 <sup>-5</sup> | SCD5                                 | Secondary Analysis |
| rs4740392  | 9  | 130894500 | 0.18 | 3.00x10 <sup>-5</sup> | FIBCD1,LAMC3                         | Secondary Analysis |
| rs10822550 | 10 | 66863143  | 0.49 | 3.10x10 <sup>-5</sup> | NA                                   | Secondary Analysis |
| rs3794716  | 17 | 78152456  | 0.09 | 3.10x10 <sup>-5</sup> | FOXK2,WDR45L,RAB40B                  | Secondary Analysis |
| rs4150894  | 8  | 86292120  | 0.03 | 3.20x10 <sup>-5</sup> | LRRCC1,E2F5,C8orf59,CA13             | Secondary Analysis |
| rs1838724  | 5  | 53277764  | 0.23 | 3.30x10 <sup>-5</sup> | ARL15                                | Secondary Analysis |

|            |    |           |      |                       |                |                    |
|------------|----|-----------|------|-----------------------|----------------|--------------------|
| rs655763   | 11 | 108682027 | 0.23 | 3.30x10 <sup>-5</sup> | NA             | Secondary Analysis |
| rs10803554 | 2  | 137719928 | 0.47 | 3.30x10 <sup>-5</sup> | <i>THSD7B</i>  | Secondary Analysis |
| rs9586741  | 13 | 104537871 | 0.35 | 3.40x10 <sup>-5</sup> | NA             | Secondary Analysis |
| rs616582   | 2  | 111658226 | 0.38 | 3.40x10 <sup>-5</sup> | <i>BCL2L11</i> | Secondary Analysis |

Genes: All genes found within a segment defined by all SNPs with an  $r^2 > 0.5$  with the reference SNP.

NA: not available - there is no gene found within the segment defined by all SNPs with an  $r^2 > 0.5$  with the reference SNP

N.B. Within each SNP category, SNPs are ranked by  $P$  value. The  $P$  values reported for the “secondary analysis” SNPs are the  $P$  values derived from the analysis that includes a term for gender (see supplementary methods). The *IL2RA* locus SNP rs2104286 is a known association but was included into the replication panel as one of the top 100 loci SNPs.

**Supplementary Table 3. Comprehensive results of the replication and joint analyses with the meta-analysis results.**

| CHR | SNP        | A1 | A2 | BP        | CHISQ  | OR   | L95  | U95  | MAF_USA | MAF_UK | $P_{\text{replication}}$ | $P_{\text{meta}}$       | $P_{\text{Joint}}$      | Genes of interest                           |
|-----|------------|----|----|-----------|--------|------|------|------|---------|--------|--------------------------|-------------------------|-------------------------|---------------------------------------------|
| 6   | rs3135388  | A  | G  | 32521029  | 335.10 | 2.75 | 2.46 | 3.07 | 0.22    | 0.21   | $7.35 \times 10^{-75}$   | $7.44 \times 10^{-164}$ | $3.80 \times 10^{-225}$ | <i>BTNL2,HLA-DRA</i>                        |
| 6   | rs2523393  | G  | A  | 29813638  | 30.55  | 0.78 | 0.72 | 0.85 | 0.41    | 0.41   | $3.26 \times 10^{-8}$    | $3.36 \times 10^{-11}$  | $1.04 \times 10^{-17}$  | <i>ZFP57,HLA-F</i>                          |
| 12  | rs1800693  | C  | T  | 6310270   | 17.57  | 1.20 | 1.10 | 1.31 | 0.45    | 0.42   | $2.77 \times 10^{-5}$    | $7.52 \times 10^{-8}$   | $1.59 \times 10^{-11}$  | <i>TNFRSF1A</i>                             |
| 16  | rs17445836 | A  | G  | 84575164  | 17.40  | 0.80 | 0.72 | 0.89 | 0.19    | 0.22   | $3.03 \times 10^{-5}$    | $3.05 \times 10^{-5}$   | $3.73 \times 10^{-9}$   | <i>IRF8</i>                                 |
| 1   | rs2300747  | G  | A  | 116905738 | 14.31  | 0.77 | 0.68 | 0.88 | 0.12    | 0.11   | 0.000155                 | $2.44 \times 10^{-7}$   | $3.10 \times 10^{-10}$  | <i>CD58,IGSF3</i>                           |
| 12  | rs4149576  | T  | C  | 6319376   | 12.94  | 1.17 | 1.07 | 1.27 | 0.46    | 0.43   | 0.000322                 | $5.84 \times 10^{-6}$   | $1.03 \times 10^{-8}$   | <i>PLEKHG6,TNFRSF1A,SCNN1A,LTBR</i>         |
| 2   | rs882300   | T  | C  | 136692725 | 15.75  | 0.84 | 0.77 | 0.92 | 0.39    | 0.46   | 0.000517                 | $7.23 \times 10^{-5}$   | $1.37 \times 10^{-7}$   | <i>CXCR4</i>                                |
| 1   | rs10735781 | G  | C  | 92893695  | 10.43  | 1.16 | 1.06 | 1.26 | 0.38    | 0.37   | 0.0012                   | 0.00192                 | $7.55 \times 10^{-6}$   | <i>EVI5</i>                                 |
| 11  | rs17824933 | G  | C  | 60517188  | 10.39  | 1.18 | 1.07 | 1.30 | 0.25    | 0.23   | 0.0013                   | $4.74 \times 10^{-8}$   | $3.79 \times 10^{-9}$   | <i>TMEM132A,SLC15A3,CD6</i>                 |
| 1   | rs12025416 | C  | T  | 116839810 | 10.34  | 0.81 | 0.71 | 0.92 | 0.13    | 0.11   | 0.0013                   | $2.32 \times 10^{-7}$   | $1.16 \times 10^{-9}$   | <i>CD58</i>                                 |
| 16  | rs1401884  | C  | G  | 84571052  | 10.16  | 0.84 | 0.75 | 0.93 | 0.17    | 0.19   | 0.0014                   | 0.000114                | $6.83 \times 10^{-7}$   | <i>IRF8</i>                                 |
| 10  | rs7089861  | G  | C  | 6150332   | 9.51   | 0.86 | 0.78 | 0.95 | 0.26    | 0.24   | 0.0020                   | $3.11 \times 10^{-5}$   | $3.38 \times 10^{-7}$   | <i>IL2RA,RBM17</i>                          |
| 16  | rs12708716 | G  | A  | 11087374  | 9.43   | 0.87 | 0.79 | 0.95 | 0.35    | 0.33   | 0.0021                   | 0.00017                 | $1.49 \times 10^{-6}$   | <i>CLEC16A</i>                              |
| 16  | rs11640138 | G  | A  | 11270230  | 8.99   | 0.88 | 0.81 | 0.96 | 0.45    | 0.44   | 0.0027                   | 0.00423                 | $3.41 \times 10^{-5}$   | <i>SOCS1,TNP2,PRM3,PRM2,PRM1</i>            |
| 16  | rs11865121 | A  | C  | 11074189  | 8.42   | 0.87 | 0.80 | 0.96 | 0.31    | 0.29   | 0.0037                   | $1.30 \times 10^{-5}$   | $1.77 \times 10^{-7}$   | <i>CLEC16A</i>                              |
| 16  | rs7184083  | A  | G  | 11135415  | 8.41   | 1.14 | 1.04 | 1.24 | 0.37    | 0.36   | 0.0037                   | $2.64 \times 10^{-5}$   | $5.94 \times 10^{-7}$   | <i>CLEC16A</i>                              |
| 10  | rs2104286  | C  | T  | 6139051   | 7.87   | 0.87 | 0.79 | 0.96 | 0.24    | 0.25   | 0.0050                   | $1.52 \times 10^{-6}$   | $9.33 \times 10^{-8}$   | <i>IL2RA,RBM17</i>                          |
| 6   | rs9321619  | G  | A  | 137916101 | 7.78   | 0.89 | 0.81 | 0.96 | 0.47    | 0.46   | 0.0053                   | 0.000934                | $1.71 \times 10^{-5}$   | <i>OLIG3</i>                                |
| 16  | rs11860603 | C  | T  | 11072518  | 7.60   | 0.88 | 0.80 | 0.96 | 0.32    | 0.29   | 0.0058                   | $5.62 \times 10^{-6}$   | $3.04 \times 10^{-7}$   | <i>CLEC16A</i>                              |
| 13  | rs9586741  | C  | A  | 104537871 | 6.71   | 0.89 | 0.81 | 0.97 | 0.30    | 0.32   | 0.0096                   | $3.40 \times 10^{-5}$   | $1.27 \times 10^{-4}$   | NA                                          |
| 7   | rs2214935  | G  | A  | 22261885  | 6.46   | 1.12 | 1.03 | 1.23 | 0.34    | 0.34   | 0.0110                   | $3.78 \times 10^{-5}$   | $2.93 \times 10^{-6}$   | <i>RAPGEF5</i>                              |
| 3   | rs4680534  | C  | T  | 161181639 | 6.18   | 1.12 | 1.02 | 1.22 | 0.37    | 0.36   | 0.0129                   | $6.80 \times 10^{-5}$   | $5.58 \times 10^{-6}$   | <i>IL12A</i>                                |
| 12  | rs7137953  | T  | C  | 119379068 | 5.96   | 1.15 | 1.03 | 1.28 | 0.19    | 0.18   | 0.0147                   | $1.60 \times 10^{-5}$   | $2.19 \times 10^{-5}$   | <i>COX6A1,TRIAP1,GATC,SFRS9,DYNLL1,COQ5</i> |
| 10  | rs1250540  | G  | A  | 80706013  | 5.91   | 1.12 | 1.02 | 1.22 | 0.35    | 0.40   | 0.0151                   | $9.89 \times 10^{-6}$   | $1.59 \times 10^{-6}$   | <i>ZMIZ1</i>                                |
| 1   | rs2760524  | A  | G  | 190797171 | 5.88   | 0.87 | 0.77 | 0.97 | 0.16    | 0.17   | 0.0153                   | 0.000107                | $9.77 \times 10^{-6}$   | <i>RGS1</i>                                 |
| 16  | rs1376041  | T  | C  | 56247384  | 5.87   | 0.89 | 0.81 | 0.98 | 0.30    | 0.30   | 0.0154                   | $7.25 \times 10^{-6}$   | 0.1886                  | <i>GPR56,GPR97,CCDC135</i>                  |
| 3   | rs7622984  | A  | T  | 30183339  | 5.61   | 0.81 | 0.68 | 0.96 | 0.06    | 0.06   | 0.0179                   | $4.30 \times 10^{-5}$   | 0.2786                  | NA                                          |
| 5   | rs6897932  | T  | C  | 35910332  | 5.60   | 0.89 | 0.81 | 0.98 | 0.25    | 0.27   | 0.0180                   | $7.71 \times 10^{-6}$   | $1.67 \times 10^{-6}$   | <i>SPEF2,IL7R,CAPSL</i>                     |

|    |            |   |   |           |      |      |      |      |      |      |        |                       |                         |                                            |
|----|------------|---|---|-----------|------|------|------|------|------|------|--------|-----------------------|-------------------------|--------------------------------------------|
| 6  | rs17066096 | G | A | 137494601 | 5.58 | 1.13 | 1.02 | 1.24 | 0.26 | 0.24 | 0.0182 | 0.000395              | 3.33x 10 <sup>-5</sup>  | <i>IL22RA2</i>                             |
| 12 | rs7311897  | C | T | 8911595   | 5.42 | 0.83 | 0.71 | 0.97 | 0.08 | 0.08 | 0.0200 | 2.80x10 <sup>-5</sup> | 5.67x 10 <sup>-5</sup>  | <i>A2ML1,PHC1</i>                          |
| 10 | rs10822550 | G | A | 66863143  | 5.36 | 1.11 | 1.02 | 1.20 | 0.48 | 0.46 | 0.0207 | 3.10x10 <sup>-5</sup> | 1.71x 10 <sup>-5</sup>  | NA                                         |
| 1  | rs11811702 | G | A | 33122770  | 5.29 | 0.89 | 0.81 | 0.98 | 0.27 | 0.24 | 0.0215 | 3.07x10 <sup>-5</sup> | 5.82 x 10 <sup>-6</sup> | <i>S100PBP,FNDC5,HPCA,TMEM54,RNF19B</i>    |
| 15 | rs16971851 | A | G | 31599801  | 5.10 | 0.89 | 0.81 | 0.98 | 0.23 | 0.24 | 0.0239 | 2.32x10 <sup>-5</sup> | 0.2080                  | <i>RYR3</i>                                |
| 1  | rs11165441 | A | G | 91996935  | 5.10 | 0.87 | 0.78 | 0.98 | 0.15 | 0.16 | 0.0240 | 0.000226              | 3.01x 10 <sup>-5</sup>  | <i>TGFBR3</i>                              |
| 5  | rs6896969  | A | C | 40460183  | 4.58 | 0.91 | 0.83 | 0.99 | 0.38 | 0.40 | 0.0324 | 1.44x10 <sup>-7</sup> | 2.40x 10 <sup>-7</sup>  | <i>PTGER4</i>                              |
| 6  | rs892999   | A | G | 138180398 | 4.56 | 1.18 | 1.01 | 1.37 | 0.09 | 0.09 | 0.0327 | 5.84x10 <sup>-6</sup> | 3.12 x 10 <sup>-6</sup> | <i>TNFAIP3</i>                             |
| 22 | rs11704699 | G | T | 16150181  | 4.33 | 0.86 | 0.75 | 0.99 | 0.11 | 0.10 | 0.0375 | 4.67x10 <sup>-5</sup> | 0.2009                  | NA                                         |
| 7  | rs17280766 | G | A | 13603894  | 4.26 | 0.83 | 0.69 | 0.99 | 0.06 | 0.05 | 0.0389 | 4.27x10 <sup>-5</sup> | 1.63x 10 <sup>-5</sup>  | NA                                         |
| 2  | rs4606981  | C | T | 133044646 | 3.95 | 0.91 | 0.82 | 1.00 | 0.26 | 0.27 | 0.0468 | 4.14x10 <sup>-5</sup> | 0.1720                  | <i>GPR39</i>                               |
| 17 | rs4239162  | A | G | 43110809  | 3.90 | 0.92 | 0.84 | 1.00 | 0.49 | 0.49 | 0.0484 | 8.19x10 <sup>-6</sup> | 6.93 x 10 <sup>-6</sup> | <i>NPEPPS,KPNB1,TBKBP1,TBX21</i>           |
| 12 | rs1790100  | G | T | 122222678 | 3.86 | 1.11 | 1.00 | 1.22 | 0.24 | 0.22 | 0.0495 | 2.74x10 <sup>-7</sup> | 7.21x 10 <sup>-7</sup>  | <i>MPHOSPH9</i>                            |
| 5  | rs4976682  | T | C | 176658608 | 3.74 | 0.88 | 0.77 | 1.00 | 0.11 | 0.11 | 0.0532 | 4.39x10 <sup>-5</sup> | 2.56x 10 <sup>-5</sup>  | <i>NSD1,RAB24,PRELID1,MXD3,LMAN2,RGS14</i> |
| 22 | rs9621545  | G | C | 31451988  | 3.68 | 1.11 | 1.00 | 1.23 | 0.20 | 0.20 | 0.0551 | 8.94x10 <sup>-5</sup> | 4.44x 10 <sup>-5</sup>  | <i>SYN3</i>                                |
| 10 | rs11256497 | A | G | 6127800   | 3.68 | 1.09 | 1.00 | 1.19 | 0.40 | 0.38 | 0.0552 | 1.60x10 <sup>-5</sup> | 1.33x 10 <sup>-5</sup>  | <i>IL2RA,RBM17</i>                         |
| 2  | rs10191601 | C | T | 204163615 | 3.67 | 1.09 | 1.00 | 1.19 | 0.43 | 0.40 | 0.0555 | 1.08x10 <sup>-5</sup> | 1.02x 10 <sup>-5</sup>  | <i>RAPH1</i>                               |
| 11 | rs655763   | C | T | 108682027 | 3.59 | 1.09 | 1.00 | 1.19 | 0.34 | 0.33 | 0.0582 | 3.30x10 <sup>-5</sup> | 4.91x 10 <sup>-5</sup>  | NA                                         |
| 1  | rs11164814 | G | A | 93033961  | 3.55 | 1.10 | 1.00 | 1.21 | 0.28 | 0.27 | 0.0596 | 2.44x10 <sup>-5</sup> | 1.99x 10 <sup>-5</sup>  | <i>EVI5,RPL5,FAM69A</i>                    |
| 2  | rs4668486  | A | C | 16160643  | 3.46 | 0.91 | 0.82 | 1.01 | 0.24 | 0.23 | 0.0630 | 1.20x10 <sup>-5</sup> | 4.33x 10 <sup>-5</sup>  | NA                                         |
| 12 | rs2049114  | T | C | 122223291 | 3.38 | 1.10 | 0.99 | 1.22 | 0.24 | 0.22 | 0.0659 | 1.30x10 <sup>-7</sup> | 1.15 x 10 <sup>-6</sup> | <i>MPHOSPH9</i>                            |
| 2  | rs10803554 | C | T | 137602666 | 3.11 | 1.08 | 0.99 | 1.18 | 0.42 | 0.39 | 0.0777 | 3.30x10 <sup>-5</sup> | 0.0015                  | <i>THSD7B</i>                              |
| 8  | rs4150894  | A | G | 86292120  | 3.06 | 1.29 | 0.97 | 1.72 | 0.02 | 0.02 | 0.0802 | 3.20x10 <sup>-5</sup> | 2.16x 10 <sup>-4</sup>  | <i>LRRCC1,E2F5,C8orf59,CA13</i>            |
| 16 | rs17765606 | G | A | 64540948  | 3.00 | 1.24 | 0.97 | 1.59 | 0.04 | 0.02 | 0.0832 | 5.20x10 <sup>-7</sup> | 9.35x 10 <sup>-5</sup>  | NA                                         |
| 17 | rs3794716  | A | G | 78152456  | 2.91 | 1.16 | 0.98 | 1.36 | 0.07 | 0.07 | 0.0883 | 3.10x10 <sup>-5</sup> | 4.19x 10 <sup>-4</sup>  | <i>FO XK2,WDR45L,RAB40B</i>                |
| 17 | rs9901869  | G | A | 42930205  | 2.88 | 1.08 | 0.99 | 1.17 | 0.49 | 0.49 | 0.0895 | 2.85x10 <sup>-6</sup> | 8.72 x 10 <sup>-6</sup> | <i>C17orf57,NPEPPS</i>                     |
| 15 | rs12913890 | C | G | 58944903  | 2.80 | 1.08 | 0.99 | 1.17 | 0.47 | 0.48 | 0.0942 | 0.000873              | 4.63x 10 <sup>-4</sup>  | <i>RORA</i>                                |
| 16 | rs9924445  | A | G | 85304319  | 2.72 | 1.19 | 0.97 | 1.46 | 0.05 | 0.04 | 0.0989 | 1.09x10 <sup>-5</sup> | 2.46x 10 <sup>-5</sup>  | NA                                         |
| 2  | rs6732091  | A | G | 204220071 | 2.72 | 1.08 | 0.99 | 1.17 | 0.40 | 0.37 | 0.0994 | 0.000174              | 1.60x 10 <sup>-4</sup>  | <i>CD28</i>                                |
| 9  | rs2492853  | C | T | 90021744  | 2.70 | 0.92 | 0.83 | 1.02 | 0.23 | 0.24 | 0.100  | 3.95x10 <sup>-5</sup> | 0.1044                  | NA                                         |
| 6  | rs6926566  | T | C | 112190592 | 2.69 | 0.93 | 0.85 | 1.01 | 0.42 | 0.41 | 0.101  | 0.000143              | 1.44x 10 <sup>-4</sup>  | <i>FYN</i>                                 |

|    |            |   |   |           |      |      |      |      |      |      |       |                       |                        |                                           |
|----|------------|---|---|-----------|------|------|------|------|------|------|-------|-----------------------|------------------------|-------------------------------------------|
| 2  | rs1404773  | A | T | 215847577 | 2.64 | 1.09 | 0.98 | 1.21 | 0.22 | 0.20 | 0.105 | 3.81x10 <sup>-5</sup> | 0.1001                 | AT1C                                      |
| 4  | rs1880719  | T | C | 83836459  | 2.63 | 0.93 | 0.86 | 1.02 | 0.43 | 0.46 | 0.105 | 2.90x10 <sup>-5</sup> | 2.21x 10 <sup>-4</sup> | SCD5                                      |
| 1  | rs1182580  | T | C | 104248305 | 2.53 | 0.93 | 0.86 | 1.02 | 0.44 | 0.48 | 0.112 | 7.62x10 <sup>-6</sup> | 2.37x 10 <sup>-5</sup> | NA                                        |
| 20 | rs6131888  | G | A | 16925054  | 2.44 | 0.93 | 0.85 | 1.02 | 0.38 | 0.36 | 0.118 | 4.43x10 <sup>-5</sup> | 0.0961                 | NA                                        |
| 22 | rs741195   | G | C | 19323766  | 2.43 | 0.92 | 0.84 | 1.02 | 0.23 | 0.25 | 0.119 | 4.45x10 <sup>-5</sup> | 0.0957                 | MED15                                     |
| 17 | rs7217180  | A | G | 54979905  | 2.40 | 1.08 | 0.98 | 1.20 | 0.24 | 0.22 | 0.121 | 1.10x10 <sup>-5</sup> | 2.31x 10 <sup>-4</sup> | DHX40                                     |
| 1  | rs7517186  | A | C | 41676608  | 2.28 | 1.07 | 0.98 | 1.17 | 0.40 | 0.39 | 0.131 | 8.83x10 <sup>-6</sup> | 0.0512                 | EDN2                                      |
| 9  | rs2236293  | A | G | 35831783  | 2.23 | 1.07 | 0.98 | 1.16 | 0.43 | 0.42 | 0.135 | 0.00513               | 0.4051                 | NPR2,SPAG8,HINT2,C9orf128,C9orf127,OR13J1 |
| 14 | rs4468527  | A | G | 51394881  | 2.19 | 1.10 | 0.97 | 1.25 | 0.13 | 0.12 | 0.139 | 4.09x10 <sup>-5</sup> | 9.97x 10 <sup>-5</sup> | GGN2                                      |
| 19 | rs2303759  | G | T | 54560863  | 2.16 | 1.07 | 0.98 | 1.18 | 0.28 | 0.27 | 0.142 | 0.00273               | 0.0018                 | SLC6A16,CD37,TEAD2,DKKL1,FLJ32658,PTH2    |
| 5  | rs931555   | T | C | 35839334  | 2.13 | 0.93 | 0.85 | 1.02 | 0.30 | 0.33 | 0.144 | 2.73x10 <sup>-6</sup> | 1.87x 10 <sup>-5</sup> | SPEF2,IL7R                                |
| 18 | rs763361   | T | C | 65682622  | 2.10 | 1.07 | 0.98 | 1.16 | 0.48 | 0.47 | 0.148 | 0.157                 | 0.0429                 | DOK6,CD226                                |
| 16 | rs1035946  | G | A | 24881927  | 1.94 | 0.93 | 0.83 | 1.03 | 0.19 | 0.18 | 0.163 | 1.38x10 <sup>-5</sup> | 6.43x 10 <sup>-5</sup> | SLC5A11,ARHGAP17                          |
| 5  | rs1838724  | T | C | 53277764  | 1.91 | 1.07 | 0.97 | 1.19 | 0.24 | 0.22 | 0.167 | 3.30x10 <sup>-5</sup> | 6.89x 10 <sup>-4</sup> | ARL15                                     |
| 21 | rs2839578  | C | G | 43025706  | 1.89 | 1.07 | 0.97 | 1.17 | 0.32 | 0.31 | 0.170 | 3.49x10 <sup>-6</sup> | 0.0290                 | PDE9A                                     |
| 11 | rs10892613 | A | G | 120063294 | 1.84 | 1.09 | 0.96 | 1.24 | 0.13 | 0.12 | 0.175 | 3.06x10 <sup>-5</sup> | 1.20x 10 <sup>-4</sup> | GRIK4                                     |
| 17 | rs4792311  | A | G | 12855734  | 1.79 | 0.94 | 0.86 | 1.03 | 0.31 | 0.28 | 0.181 | 0.00867               | 0.4081                 | RICH2,ELAC2                               |
| 4  | rs11736632 | A | G | 56867092  | 1.75 | 1.12 | 0.95 | 1.32 | 0.07 | 0.07 | 0.186 | 5.67x10 <sup>-6</sup> | 4.59x 10 <sup>-5</sup> | KIAA1211,AASDH                            |
| 2  | rs616582   | T | C | 111658466 | 1.60 | 1.06 | 0.97 | 1.15 | 0.45 | 0.42 | 0.206 | 3.40x10 <sup>-5</sup> | 0.0018                 | BCL2L11                                   |
| 15 | rs17304143 | T | G | 60364343  | 1.57 | 1.08 | 0.96 | 1.22 | 0.15 | 0.13 | 0.210 | 2.10x10 <sup>-5</sup> | 3.57x 10 <sup>-4</sup> | NA                                        |
| 5  | rs395561   | C | A | 106889874 | 1.56 | 1.06 | 0.97 | 1.15 | 0.43 | 0.39 | 0.211 | 4.22x10 <sup>-5</sup> | 2.00x 10 <sup>-4</sup> | EFNA5                                     |
| 17 | rs17581498 | G | T | 71305642  | 1.50 | 1.08 | 0.95 | 1.22 | 0.14 | 0.13 | 0.221 | 1.45x10 <sup>-5</sup> | 1.11x 10 <sup>-4</sup> | ITGB4,GALK1,H3F3B,UNK,UNC13D,WBP2         |
| 18 | rs7232625  | C | A | 59106929  | 1.48 | 0.93 | 0.82 | 1.05 | 0.14 | 0.15 | 0.224 | 0.000358              | 8.57x 10 <sup>-4</sup> | BCL2,FVT1                                 |
| 7  | rs10244467 | C | T | 22777741  | 1.45 | 0.91 | 0.78 | 1.06 | 0.08 | 0.08 | 0.228 | 3.37x10 <sup>-7</sup> | 0.0087                 | IL6,TOMM7                                 |
| 17 | rs2304494  | T | C | 37216477  | 1.45 | 1.10 | 0.94 | 1.29 | 0.07 | 0.09 | 0.228 | 1.70x10 <sup>-5</sup> | 0.0720                 | JUP,SC65,FKBP10,NT5C3L,KLHL10,KLHL11      |
| 5  | rs10454951 | A | G | 6305863   | 1.45 | 1.09 | 0.95 | 1.26 | 0.09 | 0.11 | 0.228 | 1.60x10 <sup>-5</sup> | 0.0644                 | FLJ33360                                  |
| 15 | rs16967121 | A | G | 36710299  | 1.42 | 1.10 | 0.94 | 1.30 | 0.08 | 0.07 | 0.234 | 4.26x10 <sup>-5</sup> | 2.39x 10 <sup>-4</sup> | NA                                        |
| 7  | rs11772925 | T | C | 150059042 | 1.28 | 0.93 | 0.83 | 1.05 | 0.15 | 0.15 | 0.259 | 5.32x10 <sup>-6</sup> | 8.01x 10 <sup>-5</sup> | GIMAP2,GIMAP1,GIMAP5                      |
| 8  | rs7814314  | G | A | 136905069 | 1.25 | 0.94 | 0.85 | 1.05 | 0.21 | 0.24 | 0.263 | 2.79x10 <sup>-5</sup> | 2.25x 10 <sup>-4</sup> | NA                                        |
| 16 | rs9940149  | A | G | 240642    | 1.11 | 0.94 | 0.85 | 1.05 | 0.20 | 0.17 | 0.292 | 4.88x10 <sup>-5</sup> | 3.82x 10 <sup>-4</sup> | LUC7L,ITFG3,RGS11,ARHGDI5,PDIA2,AXIN1     |
| 19 | rs918434   | G | C | 52452069  | 1.08 | 1.05 | 0.96 | 1.14 | 0.44 | 0.42 | 0.298 | 1.10x10 <sup>-5</sup> | 7.54x 10 <sup>-4</sup> | SAE1,BBC3,CCDC9,C5AR1                     |

|    |            |   |   |           |      |      |      |      |      |      |       |                       |                        |                                  |
|----|------------|---|---|-----------|------|------|------|------|------|------|-------|-----------------------|------------------------|----------------------------------|
| 10 | rs1914184  | G | T | 63870389  | 1.08 | 1.05 | 0.96 | 1.14 | 0.41 | 0.39 | 0.299 | 0.000963              | 0.1315                 | ZNF365                           |
| 6  | rs352074   | G | T | 114323639 | 1.07 | 0.95 | 0.85 | 1.05 | 0.21 | 0.17 | 0.301 | 0.000294              | 0.0012                 | MARCKS,HDAC2                     |
| 15 | rs3816800  | G | C | 23476187  | 1.04 | 0.96 | 0.88 | 1.04 | 0.47 | 0.48 | 0.309 | 0.00684               | 0.2649                 | ATP10A                           |
| 2  | rs12999011 | C | T | 190213032 | 0.97 | 1.07 | 0.94 | 1.21 | 0.13 | 0.13 | 0.324 | 1.60x10 <sup>-5</sup> | 0.0615                 | SLC40A1,ASNSD1,ANKAR             |
| 11 | rs1699105  | G | A | 120947829 | 0.97 | 0.96 | 0.88 | 1.04 | 0.40 | 0.40 | 0.324 | 0.000412              | 0.0882                 | SORL1                            |
| 13 | rs201763   | G | T | 49917022  | 0.95 | 0.96 | 0.87 | 1.05 | 0.30 | 0.31 | 0.329 | 8.32x10 <sup>-6</sup> | 1.65x 10 <sup>-4</sup> | NA                               |
| 2  | rs7574456  | C | T | 136606529 | 0.85 | 1.05 | 0.95 | 1.16 | 0.24 | 0.27 | 0.356 | 2.50x10 <sup>-5</sup> | 0.0011                 | CXCR4                            |
| 5  | rs17346755 | G | T | 58000989  | 0.85 | 0.95 | 0.85 | 1.06 | 0.19 | 0.18 | 0.356 |                       | 6.71x 10 <sup>-4</sup> | RAB3C                            |
| 17 | rs11658169 | C | T | 19812514  | 0.85 | 0.96 | 0.88 | 1.05 | 0.39 | 0.38 | 0.357 | 3.99x10 <sup>-5</sup> | 4.85x 10 <sup>-4</sup> | AKAP10                           |
| 22 | rs135382   | T | C | 47176626  | 0.79 | 0.95 | 0.83 | 1.07 | 0.13 | 0.14 | 0.374 | 3.73x10 <sup>-5</sup> | 5.09x 10 <sup>-4</sup> | NA                               |
| 1  | rs6691787  | T | C | 68179214  | 0.79 | 1.05 | 0.95 | 1.16 | 0.23 | 0.21 | 0.374 | 1.30x10 <sup>-5</sup> | 0.0028                 | NA                               |
| 16 | rs251921   | G | C | 13110329  | 0.75 | 1.04 | 0.95 | 1.13 | 0.48 | 0.48 | 0.386 | 2.40x10 <sup>-5</sup> | 7.65x 10 <sup>-4</sup> | NA                               |
| 2  | rs4668993  | T | C | 15869752  | 0.73 | 0.96 | 0.88 | 1.05 | 0.41 | 0.40 | 0.394 | 5.13x10 <sup>-6</sup> | 0.0122                 | NA                               |
| 3  | rs711663   | G | A | 4437774   | 0.72 | 1.16 | 0.82 | 1.63 | 0.01 | 0.02 | 0.395 | 1.63x10 <sup>-5</sup> | 3.49x 10 <sup>-4</sup> | SUMF1                            |
| 10 | rs12260682 | G | C | 126644390 | 0.72 | 0.92 | 0.75 | 1.12 | 0.05 | 0.04 | 0.398 | 4.54x10 <sup>-5</sup> | 0.0291                 | ZRANB1,CTBP2                     |
| 6  | rs6910219  | T | A | 33570006  | 0.71 | 1.06 | 0.93 | 1.20 | 0.12 | 0.12 | 0.401 | 9.67x10 <sup>-5</sup> | 0.0010                 | SYNGAP1,ZBTB9                    |
| 4  | rs17086658 | T | C | 56864663  | 0.62 | 1.06 | 0.92 | 1.22 | 0.10 | 0.10 | 0.431 | 8.13x10 <sup>-7</sup> | 0.0049                 | KIAA1211,AASDH                   |
| 5  | rs158968   | C | A | 57977726  | 0.60 | 0.96 | 0.87 | 1.06 | 0.23 | 0.21 | 0.438 | 4.18x10 <sup>-5</sup> | 7.38x 10 <sup>-4</sup> | RAB3C                            |
| 6  | rs9347662  | C | G | 162896005 | 0.57 | 0.96 | 0.86 | 1.07 | 0.17 | 0.17 | 0.452 | 0.000694              | 0.0041                 | PARK2                            |
| 1  | rs1294012  | T | C | 9207768   | 0.53 | 1.10 | 0.85 | 1.43 | 0.03 | 0.02 | 0.466 | 2.20x10 <sup>-5</sup> | 0.0132                 | H6PD                             |
| 4  | rs2726453  | G | T | 106539285 | 0.53 | 1.03 | 0.95 | 1.12 | 0.45 | 0.46 | 0.468 | 3.78x10 <sup>-7</sup> | 4.28x 10 <sup>-4</sup> | PPA2                             |
| 3  | rs1356122  | C | G | 155666256 | 0.53 | 1.04 | 0.93 | 1.16 | 0.18 | 0.18 | 0.468 | 1.28x10 <sup>-5</sup> | 0.0031                 | GPR149                           |
| 1  | rs11580092 | A | G | 58606614  | 0.52 | 0.97 | 0.88 | 1.06 | 0.33 | 0.33 | 0.470 | 4.13x10 <sup>-5</sup> | 0.0222                 | NA                               |
| 18 | rs426921   | T | C | 63402133  | 0.52 | 0.96 | 0.85 | 1.08 | 0.15 | 0.16 | 0.471 | 2.54x10 <sup>-5</sup> | 1.41x 10 <sup>-4</sup> | NA                               |
| 2  | rs2357954  | C | T | 54215941  | 0.52 | 1.03 | 0.95 | 1.13 | 0.38 | 0.39 | 0.471 | 1.71x10 <sup>-6</sup> | 0.0180                 | ACYP2                            |
| 16 | rs10775336 | G | C | 56103237  | 0.51 | 0.94 | 0.80 | 1.11 | 0.08 | 0.07 | 0.477 | 3.60x10 <sup>-5</sup> | 0.0205                 | COQ9,POLR2C,DOK4,CCDC102A,GPR114 |
| 17 | rs820240   | A | G | 71094622  | 0.50 | 0.96 | 0.86 | 1.07 | 0.19 | 0.16 | 0.478 | 1.90x10 <sup>-5</sup> | 0.0435                 | LLGL2,RECQL5                     |
| 11 | rs11023151 | G | A | 14202675  | 0.49 | 0.96 | 0.84 | 1.08 | 0.13 | 0.14 | 0.482 | 1.54x10 <sup>-5</sup> | 0.0141                 | SPON1,RRAS2                      |
| 5  | rs254837   | G | C | 158615778 | 0.49 | 0.95 | 0.83 | 1.09 | 0.11 | 0.10 | 0.483 | 1.96x10 <sup>-5</sup> | 5.83x 10 <sup>-4</sup> | RNF145,UBLCP1,IL12B              |
| 8  | rs2277136  | C | T | 6322616   | 0.39 | 1.04 | 0.92 | 1.18 | 0.14 | 0.13 | 0.533 | 2.40x10 <sup>-5</sup> | 0.0054                 | ANGPT2,MCPH1                     |
| 9  | rs1658957  | G | A | 6662097   | 0.37 | 1.03 | 0.94 | 1.12 | 0.49 | 0.49 | 0.544 | 1.68x10 <sup>-5</sup> | 0.0120                 | GLDC                             |

|    |            |   |   |           |      |      |      |      |      |      |       |                       |                        |                                    |
|----|------------|---|---|-----------|------|------|------|------|------|------|-------|-----------------------|------------------------|------------------------------------|
| 18 | rs17760402 | G | C | 53915666  | 0.33 | 1.07 | 0.86 | 1.33 | 0.04 | 0.04 | 0.567 | 2.38x10 <sup>-5</sup> | 9.15x 10 <sup>-4</sup> | <i>NEDD4L</i>                      |
| 18 | rs154929   | A | G | 56968545  | 0.32 | 0.97 | 0.88 | 1.08 | 0.21 | 0.24 | 0.569 | 3.91x10 <sup>-5</sup> | 0.0161                 | NA                                 |
| 5  | rs2853694  | T | G | 158681666 | 0.32 | 0.98 | 0.90 | 1.06 | 0.50 | 0.49 | 0.570 | 3.35x10 <sup>-6</sup> | 3.16x 10 <sup>-4</sup> | <i>UBLCP1,IL12B</i>                |
| 8  | rs2083914  | T | G | 6289562   | 0.32 | 1.03 | 0.92 | 1.16 | 0.17 | 0.15 | 0.574 | 0.00266               | 0.0135                 | <i>ANGPT2,MCPH1</i>                |
| 2  | rs1519529  | G | C | 136690727 | 0.30 | 1.03 | 0.93 | 1.13 | 0.26 | 0.28 | 0.584 | 4.06x10 <sup>-5</sup> | 0.0013                 | NA                                 |
| 8  | rs7814564  | T | A | 26835382  | 0.30 | 0.93 | 0.73 | 1.19 | 0.03 | 0.03 | 0.585 | 8.55x10 <sup>-6</sup> | 5.59x 10 <sup>-4</sup> | <i>ADRA1A</i>                      |
| 8  | rs1611927  | T | A | 4586651   | 0.28 | 1.03 | 0.93 | 1.14 | 0.21 | 0.22 | 0.599 | 1.36x10 <sup>-5</sup> | 0.0093                 | <i>CSMD1</i>                       |
| 13 | rs9596270  | C | T | 49740441  | 0.27 | 0.96 | 0.81 | 1.13 | 0.07 | 0.07 | 0.606 | 8.26x10 <sup>-8</sup> | 5.06x 10 <sup>-5</sup> | NA                                 |
| 3  | rs187084   | G | A | 52236071  | 0.26 | 1.02 | 0.94 | 1.12 | 0.40 | 0.37 | 0.611 | 0.000119              | 0.0232                 | <i>ALAS1,TLR9,TWF2,PPM1M,WDR82</i> |
| 10 | rs479505   | A | G | 97350709  | 0.25 | 0.97 | 0.86 | 1.09 | 0.15 | 0.16 | 0.617 | 8.25x10 <sup>-6</sup> | 6.21x 10 <sup>-4</sup> | <i>SORBS1,ALDH18A1</i>             |
| 19 | rs1862511  | A | G | 6537268   | 0.23 | 0.98 | 0.89 | 1.07 | 0.29 | 0.29 | 0.629 | 3.69x10 <sup>-5</sup> | 0.0132                 | <i>TNFSF9,CD70</i>                 |
| 2  | rs10203141 | G | C | 178898543 | 0.22 | 1.02 | 0.94 | 1.11 | 0.41 | 0.40 | 0.638 | 1.04x10 <sup>-5</sup> | 7.61x 10 <sup>-4</sup> | <i>OSBPL6</i>                      |
| 19 | rs17239559 | C | T | 59398234  | 0.21 | 0.98 | 0.90 | 1.07 | 0.38 | 0.41 | 0.645 | 0.000437              | 0.0060                 | <i>LILRB3,LILRA6,LILRB5</i>        |
| 15 | rs3814281  | A | G | 81296820  | 0.20 | 1.03 | 0.91 | 1.17 | 0.13 | 0.14 | 0.655 | 0.00801               | 0.1352                 | <i>FSD2,WHDC1,HOMER2</i>           |
| 11 | rs11604291 | G | A | 72680764  | 0.18 | 0.95 | 0.74 | 1.21 | 0.03 | 0.03 | 0.671 | 1.02x10 <sup>-5</sup> | 0.0066                 | <i>P2RY2,P2RY6,ARHGEP17</i>        |
| 1  | rs536858   | G | C | 66545614  | 0.18 | 0.98 | 0.90 | 1.07 | 0.40 | 0.40 | 0.675 | 4.67x10 <sup>-5</sup> | 0.0129                 | <i>PDE4B</i>                       |
| 3  | rs6583176  | A | G | 198009975 | 0.17 | 1.02 | 0.92 | 1.14 | 0.20 | 0.19 | 0.682 | 3.89x10 <sup>-5</sup> | 0.0116                 | <i>PAK2</i>                        |
| 14 | rs1420810  | A | G | 86572905  | 0.16 | 0.97 | 0.84 | 1.13 | 0.09 | 0.09 | 0.687 | 3.47x10 <sup>-5</sup> | 0.0109                 | NA                                 |
| 8  | rs13251655 | C | T | 119829740 | 0.16 | 1.02 | 0.93 | 1.12 | 0.32 | 0.30 | 0.689 | 3.88x10 <sup>-5</sup> | 0.0037                 | NA                                 |
| 16 | rs11643026 | A | T | 62173482  | 0.16 | 0.95 | 0.74 | 1.22 | 0.03 | 0.03 | 0.689 | 1.10x10 <sup>-5</sup> | 0.0114                 | NA                                 |
| 16 | rs17782451 | G | C | 87006977  | 0.15 | 0.95 | 0.74 | 1.22 | 0.03 | 0.03 | 0.694 | 4.16x10 <sup>-5</sup> | 0.0116                 | <i>ZFPM1</i>                       |
| 13 | rs10507622 | T | C | 58443686  | 0.14 | 0.97 | 0.81 | 1.15 | 0.07 | 0.06 | 0.707 | 1.80x10 <sup>-5</sup> | 0.0137                 | NA                                 |
| 1  | rs12042693 | A | G | 165780347 | 0.14 | 0.97 | 0.84 | 1.12 | 0.10 | 0.09 | 0.713 | 0.000262              | 0.0253                 | <i>CD247,CREG1</i>                 |
| 8  | rs4368946  | C | T | 98497864  | 0.11 | 1.03 | 0.87 | 1.21 | 0.08 | 0.06 | 0.746 | 2.90x10 <sup>-6</sup> | 0.0041                 | NA                                 |
| 14 | rs6571751  | G | A | 20840570  | 0.10 | 1.01 | 0.93 | 1.10 | 0.50 | 0.49 | 0.748 | 0.00572               | 0.0966                 | <i>HNRNPC,RPGRIP1,SUPT16H</i>      |
| 2  | rs1582844  | A | G | 153475282 | 0.10 | 0.95 | 0.67 | 1.34 | 0.01 | 0.02 | 0.754 | 2.40x10 <sup>-5</sup> | 0.0198                 | NA                                 |
| 13 | rs927544   | G | A | 46354052  | 0.10 | 1.02 | 0.92 | 1.12 | 0.26 | 0.31 | 0.757 | 4.89x10 <sup>-5</sup> | 0.0137                 | <i>HTR2A</i>                       |
| 14 | rs2022771  | C | T | 85999679  | 0.10 | 0.99 | 0.91 | 1.07 | 0.45 | 0.45 | 0.757 | 2.50x10 <sup>-5</sup> | 0.0026                 | NA                                 |
| 12 | rs12300846 | A | T | 9634751   | 0.09 | 1.01 | 0.93 | 1.11 | 0.37 | 0.36 | 0.763 | 1.85x10 <sup>-5</sup> | 0.0016                 | <i>KLRB1</i>                       |
| 7  | rs6973638  | C | T | 15363795  | 0.09 | 0.99 | 0.91 | 1.08 | 0.46 | 0.46 | 0.764 | 1.70x10 <sup>-5</sup> | 0.0031                 | <i>TMEM195</i>                     |
| 11 | rs12419184 | T | C | 125561518 | 0.09 | 1.02 | 0.88 | 1.20 | 0.09 | 0.08 | 0.764 | 1.90x10 <sup>-5</sup> | 0.0053                 | <i>RPUSD4,FAM118B</i>              |



|    |            |   |   |           |      |      |      |      |      |      |       |                       |                        |                                     |
|----|------------|---|---|-----------|------|------|------|------|------|------|-------|-----------------------|------------------------|-------------------------------------|
| 22 | rs4821818  | C | T | 37495985  | 0.09 | 1.02 | 0.89 | 1.17 | 0.12 | 0.12 | 0.766 | 3.61x10 <sup>-5</sup> | 0.0089                 | <i>GTPBP1,UNC84B,DNAL4,NPTXR</i>    |
| 3  | rs4678000  | A | G | 123373425 | 0.08 | 1.01 | 0.93 | 1.10 | 0.39 | 0.40 | 0.782 | 0.000322              | 0.0076                 | <i>CD86,CASR</i>                    |
| 18 | rs10503052 | A | G | 57050613  | 0.08 | 1.01 | 0.93 | 1.11 | 0.33 | 0.33 | 0.783 | 3.50x10 <sup>-5</sup> | 0.0083                 | NA                                  |
| 3  | rs1000361  | G | A | 27785323  | 0.07 | 1.01 | 0.93 | 1.11 | 0.34 | 0.35 | 0.792 | 1.26x10 <sup>-5</sup> | 0.0014                 | <i>EOMES</i>                        |
| 21 | rs2834044  | T | C | 33277432  | 0.06 | 1.01 | 0.92 | 1.11 | 0.29 | 0.26 | 0.800 | 0.00095               | 0.0142                 | <i>OLIG2</i>                        |
| 11 | rs11230555 | A | C | 60519710  | 0.06 | 0.99 | 0.89 | 1.10 | 0.21 | 0.22 | 0.804 | 1.64x10 <sup>-6</sup> | 5.23x 10 <sup>-4</sup> | <i>TMEM132A,SLC15A3,CD6</i>         |
| 13 | rs2325566  | G | T | 73281941  | 0.06 | 0.99 | 0.90 | 1.09 | 0.30 | 0.27 | 0.810 | 1.70x10 <sup>-5</sup> | 0.0036                 | <i>KLF12</i>                        |
| 21 | rs11088251 | C | A | 33692680  | 0.06 | 1.02 | 0.90 | 1.15 | 0.14 | 0.14 | 0.811 | 0.000885              | 0.0141                 | <i>IFNAR1,IFNGR2,TMEM50B</i>        |
| 11 | rs750780   | A | G | 33874170  | 0.05 | 0.99 | 0.89 | 1.10 | 0.21 | 0.19 | 0.818 | 1.20x10 <sup>-5</sup> | 0.0111                 | <i>LMO2</i>                         |
| 3  | rs13073434 | G | C | 155593736 | 0.04 | 1.02 | 0.82 | 1.27 | 0.03 | 0.05 | 0.834 | 2.02x10 <sup>-5</sup> | 0.0056                 | <i>GPR149</i>                       |
| 3  | rs12490899 | T | C | 30649258  | 0.04 | 1.02 | 0.82 | 1.27 | 0.04 | 0.04 | 0.848 | 5.66x10 <sup>-5</sup> | 0.0087                 | <i>TGFBR2</i>                       |
| 1  | rs4970891  | C | T | 144721950 | 0.03 | 0.99 | 0.89 | 1.10 | 0.21 | 0.20 | 0.852 | 0.000199              | 0.0157                 | NA                                  |
| 9  | rs4740392  | A | G | 132854767 | 0.03 | 0.99 | 0.89 | 1.11 | 0.18 | 0.20 | 0.863 | 3.00x10 <sup>-5</sup> | 0.0253                 | <i>FIBCD1,LAMC3</i>                 |
| 7  | rs1193335  | T | G | 127404040 | 0.02 | 0.99 | 0.91 | 1.09 | 0.35 | 0.36 | 0.888 | 3.04x10 <sup>-5</sup> | 0.0058                 | <i>C7orf54,LRRC4,SND1</i>           |
| 19 | rs11667601 | A | G | 16531660  | 0.02 | 1.01 | 0.90 | 1.13 | 0.16 | 0.15 | 0.894 | 9.13x10 <sup>-6</sup> | 0.0017                 | <i>C19orf44,CHERP,SLC35E1,MED26</i> |
| 14 | rs17179734 | G | A | 71670843  | 0.02 | 0.99 | 0.82 | 1.19 | 0.05 | 0.06 | 0.895 | 3.69x10 <sup>-5</sup> | 0.0034                 | <i>RGS6</i>                         |
| 3  | rs3806680  | G | A | 3127384   | 0.01 | 0.99 | 0.90 | 1.10 | 0.24 | 0.27 | 0.911 | 0.000125              | 0.0067                 | <i>CNTN4,IL5RA,TRNT1,CRBN</i>       |
| 12 | rs7132171  | G | C | 38936016  | 0.01 | 1.00 | 0.91 | 1.08 | 0.43 | 0.41 | 0.911 | 0.000437              | 0.0127                 | <i>LRRK2</i>                        |
| 4  | rs1017429  | A | T | 42808275  | 0.01 | 1.00 | 0.91 | 1.09 | 0.40 | 0.41 | 0.939 | 3.90x10 <sup>-6</sup> | 0.0019                 | NA                                  |
| 15 | rs8023613  | T | G | 30739485  | 0.01 | 1.00 | 0.91 | 1.11 | 0.23 | 0.22 | 0.943 | 6.60x10 <sup>-6</sup> | 0.0017                 | <i>ARHGAP11A,SCG5,GREM1</i>         |
| 10 | rs10885868 | T | C | 117912102 | 0.00 | 1.00 | 0.91 | 1.09 | 0.38 | 0.38 | 0.950 | 1.80x10 <sup>-5</sup> | 0.0053                 | <i>GFRA1</i>                        |
| 9  | rs10815231 | G | T | 547015    | 0.00 | 1.00 | 0.89 | 1.11 | 0.18 | 0.18 | 0.958 | 2.53x10 <sup>-6</sup> | 0.0011                 | <i>KANK1</i>                        |
| 14 | rs10148925 | G | A | 59157663  | 0.00 | 1.01 | 0.81 | 1.24 | 0.04 | 0.05 | 0.962 | 3.07x10 <sup>-5</sup> | 0.0047                 | <i>RTN1</i>                         |
| 1  | rs1193345  | G | A | 17786301  | 0.00 | 1.00 | 0.84 | 1.20 | 0.06 | 0.07 | 0.968 | 3.56x10 <sup>-5</sup> | 0.0050                 | <i>ARHGEF10L</i>                    |
| 17 | rs2293152  | G | C | 37735055  | 0.00 | 1.00 | 0.92 | 1.09 | 0.39 | 0.39 | 0.972 | 1.13x10 <sup>-5</sup> | 0.0028                 | <i>STAT5B,STAT5A,STAT3</i>          |
| 12 | rs7314705  | C | T | 30090640  | 0.00 | 1.00 | 0.85 | 1.17 | 0.08 | 0.07 | 0.980 | 4.10x10 <sup>-5</sup> | 0.0052                 | NA                                  |
| 21 | rs2832359  | A | T | 29790149  | 0.00 | 1.00 | 0.86 | 1.16 | 0.09 | 0.09 | 0.992 | 0.000624              | 0.0193                 | <i>GRIK1</i>                        |

Genes: All genes found within a segment defined by all SNPs with an  $r^2 > 0.5$  with the reference SNP.

NA: not available - there is no gene found within the segment defined by all SNPs with an  $r^2 > 0.5$  with the reference SNP

N.B. SNPs are ranked by their  $P$  value in the replication analysis ( $P_{\text{replication}}$ ). The meta analysis  $P$  values ( $P_{\text{meta}}$ ) and the  $P$  values in the joint analysis ( $P_{\text{joint}}$ : meta-analysis + replication analysis) are also shown.

*Success of selection strategies:* Success in this endeavor can be defined in different ways. Here, we define success as exceeding a threshold of nominal significance ( $P < 0.05$ ) in the replication analysis. Further, out of the 41 SNPs meeting this threshold, we only consider those 28 SNPs that are not found in a known MS susceptibility locus. Of the 28 remaining SNPs, 12 were in the “Top 100 loci” category. Since 100 loci were tested, the replication success rate is 12% for this category of SNPs. 8 of the 32 “candidate gene” SNPs or 25% replicate, and 5 of the 41 “secondary analysis” SNPs or 12% met our threshold of success. Also, 1 of the 8 nscSNPs (13%) met the threshold of success. Thus, all strategies were relatively equivalent in terms of success rate at the replication stage, with perhaps a slight excess in our “candidate gene” group. However, the numbers are too small to provide a definitive recommendation in terms of a SNP selection strategy; all strategies appear to be appropriate. Notably, all three novel SNPs (rs1800693, rs17445836, and rs17824933) meeting a threshold of genome-wide significance are found in the “Top 100 loci”.

**Supplementary Table 4. Logistic regression analyses to identify independent effects in susceptibility loci using the replication data.**

| Chrom | Locus   | SNP        | rank order in locus | P <sub>replication</sub> | P <sub>residual</sub> |
|-------|---------|------------|---------------------|--------------------------|-----------------------|
| 1     | CD58    | rs2300747  | 1                   | 0.0002                   | -                     |
|       |         | rs12025416 | 2                   | 0.001                    | 0.81                  |
| 5     | IL7R    | rs6897932  | 1                   | 0.018                    | -                     |
|       |         | rs931555   | 2                   | 0.1628                   | 0.34                  |
| 6     | MHC     | rs3135388  | 1                   | 1.7x10 <sup>-77</sup>    | -                     |
|       |         | rs2523393  | 2                   | 4.2x10 <sup>-8</sup>     | <0.0001               |
| 10    | IL2RA   | rs7089861  | 1                   | 0.0013                   | -                     |
|       |         | rs2104286  | 2                   | 0.0029                   | 0.062                 |
|       |         | rs11256497 | 3                   | 0.079                    | 0.51                  |
| 12    | TNFRSF1 | rs1800693  | 1                   | 0.000005                 | -                     |
|       |         | rs4149576  | 2                   | 0.0001                   | 0.45                  |
|       |         | rs4149584  | 3                   | 0.004                    | 0.035                 |
| 16    | IRF8    | rs17445836 | 1                   | 0.0001                   | -                     |
|       |         | rs1401884  | 2                   | 0.0032                   | 0.26                  |
| 16    | CLEC16A | rs12708716 | 1                   | 0.0014                   | -                     |
|       |         | rs11865121 | 2                   | 0.0024                   | 0.74                  |
|       |         | rs11860603 | 3                   | 0.0042                   | 0.92                  |

In the replication data analyzed here, it appears that only the MHC has evidence of independent associations. Nonetheless, the evidence suggests that there may be an independent risk allele within the *IL2RA* locus: rs7089861 and rs2104286 (the original MS associated SNP) are not in LD ( $r^2=0.17$  in HapMap CEU samples) and may represent distinct effects on MS susceptibility which need larger sample sizes to be fully defined. Of note, the second type I diabetes mellitus risk allele in the *IL2RA* locus (rs11594656) has been shown to have an independent effect on MS risk (Maier *et al.*, *PLOS Genetics* 2009, e1000322) but is not in LD with rs7089861 ( $r^2=0.23$  in HapMap CEU samples). Thus, further studies in larger sample collections may be able to establish independent roles for at least 3 *IL2RA* alleles in MS susceptibility.

**Supplementary Table 5a. Putative shared susceptibility loci between MS and other inflammatory diseases at *IL12A*, *OLIG3/TNFAIP3*, *PTGER4*, and *RGS1* loci**

| MS locus             | MS associated SNP | MS Meta-Analysis P-value | Inflammatory Disease         | Inflammatory disease SNP | MS Meta-Analysis P-value | $r^2$ |
|----------------------|-------------------|--------------------------|------------------------------|--------------------------|--------------------------|-------|
| <i>IL12A</i>         | rs4680534         | $6.8 \times 10^{-5}$     | Celiac disease               | rs9811792                | 0.0031                   | 0.47  |
| <i>PTGER4</i>        | rs6896969         | $1.4 \times 10^{-7}$     | Crohn's disease              | rs9292777                | $2.2 \times 10^{-7}$     | 0.97  |
| <i>RGS1</i>          | rs2760524         | 0.00011                  | Celiac disease               | rs2816316                | 0.00049                  | 0.86  |
| <i>OLIG3/TNFAIP3</i> | rs892999          | $4.27 \times 10^{-5}$    | Psoriasis                    | rs610604                 | 0.71                     | <0.01 |
|                      |                   |                          | Rheumatoid arthritis         | rs13192841               | 0.18                     |       |
|                      |                   |                          |                              | rs10499194               | 0.18                     |       |
|                      |                   |                          | Systemic Lupus Erythematosus | rs6920220                | 0.06                     |       |
|                      |                   |                          |                              | rs5029939                | 0.84                     |       |
|                      |                   |                          |                              | rs6922466                | 0.58                     |       |

$r^2$  values are calculated using HapMap CEU data for each pair of MS and other inflammatory disease SNPs within each locus.

We present  $P$  values from our meta-analysis of MS whole genome scans for both the best SNP in the MS meta-analysis (third column) and the best SNP reported for another disease (sixth column) at each locus.

**Supplementary Table 5b. Overlap of the MS and Crohn's disease replication studies following meta-analysis**

| Gene of Interest | Chrom | MS         |           |                      | Crohn's disease |           |                       | Distance (bp) | $r^2$    |
|------------------|-------|------------|-----------|----------------------|-----------------|-----------|-----------------------|---------------|----------|
|                  |       | SNP        | bp        | $P_{\text{joint}}$   | SNP             | bp        | $P_{\text{joint}}$    |               |          |
| <i>PPA2</i>      | 4     | rs2726453  | 106463957 | 0.00036              | rs10010325      | 106463957 | $5.0 \times 10^{-5}$  | 213483        | 0.0012   |
| <i>PTGER4</i>    | 5     | rs6896969  | 40460183  | $1.5 \times 10^{-7}$ | rs4613763       | 40428485  | $3.1 \times 10^{-27}$ | 31698         | 0.092    |
| <i>IL12B</i>     | 5     | rs2853694  | 158681666 | 0.00025              | rs10045431      | 158747111 | $1.9 \times 10^{-13}$ | 65445         | 0.03     |
| <i>IRF8</i>      | 16    | rs17445836 | 84575164  | $7.6 \times 10^{-9}$ | rs10863202      | 84545499  | $1.4 \times 10^{-5}$  | 29665         | 0.14     |
| <i>STAT3</i>     | 17    | rs2293152  | 37735055  | 0.0036               | rs744166        | 37767727  | $3.4 \times 10^{-12}$ | 32672         | 0.45     |
| <i>NEDD4L</i>    | 18    | rs17760402 | 53915666  | 0.0011               | rs158865        | 54054001  | $2.0 \times 10^{-5}$  | 138335        | 0.02     |
| <i>BCL2,FVT1</i> | 18    | rs7232625  | 59106929  | 0.00090              | rs7227145       | 59311578  | 0.00095               | 204649        | 0.000071 |

Distance: distance between the MS-associated and Crohn's disease-associated SNPs.

$P_{\text{joint}} = P$  value in the joint analysis of the replication and meta-analysis data. Results for the Crohn's disease analysis are taken the work of Barrett and colleagues<sup>26</sup>. MS results are taken from Supplemental Table 4.

**Supplementary Table 6a. Detailed results of Gene set Enrichment Analysis of the quantitative trait analyses.**

| Gene Set associated with rs17445836 <sup>G</sup> | Size | NES  | FDR q-val               |
|--------------------------------------------------|------|------|-------------------------|
| <i>Untreated Subjects</i>                        |      |      |                         |
| TAKEDA_NUP8_HOXA9_10D_UP*                        | 27   | 2.81 | <10 <sup>-4</sup>       |
| VERHAAK_AML_NPM1_MUT_VS_WT_UP                    | 37   | 2.80 | <10 <sup>-4</sup>       |
| TAKEDA_NUP8_HOXA9_16D_UP*                        | 19   | 2.71 | <10 <sup>-4</sup>       |
| TAKEDA_NUP8_HOXA9_3D_UP*                         | 29   | 2.70 | <10 <sup>-4</sup>       |
| TAKEDA_NUP8_HOXA9_8D_UP*                         | 24   | 2.70 | <10 <sup>-4</sup>       |
| HOHENKIRK_MONOCYTE_DEND_DN                       | 21   | 2.39 | <10 <sup>-4</sup>       |
| CARIES_PULP_UP                                   | 35   | 2.38 | <10 <sup>-4</sup>       |
| CMV-UV_HCMV_6HRS_UP                              | 17   | 2.28 | <10 <sup>-4</sup>       |
| BRCA_ER_NEG*                                     | 62   | 2.28 | <10 <sup>-4</sup>       |
| IFNA_HCMV_6HRS_UP*                               | 21   | 2.25 | <10 <sup>-4</sup>       |
| BOQUEST_CD31PLUS_VS_CD31MINUS_UP*                | 43   | 2.25 | <10 <sup>-4</sup>       |
| SANA_TNFA_ENDOTHELIAL_UP                         | 19   | 2.23 | <10 <sup>-4</sup>       |
| RADAEVA_IFNA_UP*                                 | 16   | 2.22 | <10 <sup>-4</sup>       |
| DAC_PANC_UP*                                     | 21   | 2.20 | 1.40 x 10 <sup>-4</sup> |
| DER_IFNB_UP*                                     | 17   | 2.15 | 5.49 x 10 <sup>-4</sup> |
| REOVIRUS_HEK293_UP*                              | 23   | 2.12 | 7.69 x 10 <sup>-4</sup> |
| RUTELLA_HEMATOGFSNDCS_DIFF*                      | 63   | 2.10 | 9.07 x 10 <sup>-4</sup> |
| JISON_SICKLECELL_DIFF*                           | 36   | 2.08 | 9.74 x 10 <sup>-4</sup> |
| RAS_ONCOGENIC_SIGNATURE*                         | 26   | 2.05 | 0.00130                 |
| SANA_IFNG_ENDOTHELIAL_UP                         | 15   | 2.00 | 0.00191                 |
| ICHIBA_GVHD*                                     | 21   | 1.99 | 0.00203                 |
| DIAB_NEPH_DN*                                    | 33   | 1.95 | 0.00323                 |
| TAKEDA_NUP8_HOXA9_8D_DN                          | 15   | 1.94 | 0.00342                 |
| CMV_HCMV_TIMECOURSE_ALL_UP                       | 31   | 1.92 | 0.00380                 |
| UVB_NHEK3_ALL                                    | 34   | 1.87 | 0.00706                 |
| LEI_MYB_REGULATED_GENES                          | 16   | 1.85 | 0.00784                 |
| PASSERINI_SIGNAL                                 | 21   | 1.83 | 0.00933                 |
| TARTE_MATURE_PC                                  | 29   | 1.82 | 0.00978                 |
| WIELAND_HEPATITIS_B_INDUCED                      | 20   | 1.80 | 0.0128                  |
| HSC_MATURE_ADULT                                 | 24   | 1.79 | 0.0133                  |
| HSC_MATURE_SHARED                                | 16   | 1.77 | 0.0159                  |
| FLECHNER_KIDNEY_TRANSPLANT_REJECTION_UP          | 18   | 1.76 | 0.0161                  |
| AGEING_KIDNEY_UP                                 | 32   | 1.76 | 0.0164                  |
| MATSUDA_VALPHAINKT_DIFF                          | 18   | 1.74 | 0.0190                  |
| HSC_MATURE_FETAL                                 | 18   | 1.71 | 0.0238                  |
| CMV_ALL_UP                                       | 17   | 1.70 | 0.0256                  |
| LEE_TCELLS2_UP                                   | 84   | 1.68 | 0.0305                  |

|                                               |    |      |                         |
|-----------------------------------------------|----|------|-------------------------|
| PROLIFERATION_GENES                           | 23 | 1.66 | 0.0344                  |
| UVC_HIGH_ALL_DN                               | 16 | 1.65 | 0.0377                  |
| STEMCELL_HEMATOPOIETIC_UP                     | 69 | 1.63 | 0.0410                  |
| CHIARETTI_T_ALL_DIFF                          | 30 | 1.64 | 0.0415                  |
| BROCKE_IL6                                    | 19 | 1.63 | 0.0417                  |
| KRETZSCHMAR_IL6_DIFF                          | 19 | 1.62 | 0.0440                  |
| <b><i>Interferon b Treated Subjects</i></b>   |    |      |                         |
| TAKEDA_NUP8_HOXA9_3D_UP*                      | 30 | 3.04 | <10 <sup>-4</sup>       |
| TAKEDA_NUP8_HOXA9_10D_UP*                     | 20 | 3.02 | <10 <sup>-4</sup>       |
| TAKEDA_NUP8_HOXA9_8D_UP*                      | 18 | 2.76 | <10 <sup>-4</sup>       |
| TAKEDA_NUP8_HOXA9_16D_UP*                     | 15 | 2.76 | <10 <sup>-4</sup>       |
| RADAEVA_IFNA_UP*                              | 17 | 2.75 | <10 <sup>-4</sup>       |
| REOVIRUS_HEK293_UP*                           | 29 | 2.66 | <10 <sup>-4</sup>       |
| IFNA_HCMV_6HRS_UP*                            | 15 | 2.47 | <10 <sup>-4</sup>       |
| DER_IFNA_UP*                                  | 16 | 2.39 | <10 <sup>-4</sup>       |
| DER_IFNB_UP*                                  | 20 | 2.39 | 1.28 x 10 <sup>-4</sup> |
| RAS_ONCOGENIC_SIGNATURE*                      | 25 | 2.30 | 3.61 x 10 <sup>-4</sup> |
| KUMAR_HOXA_DIFF                               | 26 | 2.28 | 6.38 x 10 <sup>-4</sup> |
| CMV_HCMV_TIMECOURSE_ALL_UP                    | 46 | 2.25 | 8.76 x 10 <sup>-4</sup> |
| HSA04620_TOLL_LIKE_RECEPTOR_SIGNALING_PATHWAY | 16 | 2.21 | 0.00108                 |
| IFN_BETA_UP                                   | 16 | 2.17 | 0.00151                 |
| IFN_ANY_UP                                    | 18 | 2.16 | 0.00154                 |
| BRCA1_OVEREXP_UP                              | 26 | 2.14 | 0.00157                 |
| WIELAND_HEPATITIS_B_INDUCED                   | 16 | 2.15 | 0.00158                 |
| HSC_MATURE_ADULT                              | 29 | 2.16 | 0.00164                 |
| KNUDSEN_PMNS_DN                               | 30 | 2.12 | 0.00180                 |
| CHEN_HOXA5_TARGETS_UP                         | 30 | 2.06 | 0.00362                 |
| JISON_SICKLECELL_DIFF*                        | 51 | 2.00 | 0.00733                 |
| CHIARETTI_T_ALL_DIFF                          | 26 | 1.97 | 0.009571                |
| BOQUEST_CD31PLUS_VS_CD31MINUS_UP*             | 46 | 1.96 | 0.0102                  |
| POD1_KO_DN                                    | 67 | 1.93 | 0.0127                  |
| RUTELLA_HEMATOGFSNDCS_DIFF*                   | 68 | 1.89 | 0.0177                  |
| ICHIBA_GVHD*                                  | 27 | 1.86 | 0.0219                  |
| UVC_HIGH_ALL_DN                               | 38 | 1.86 | 0.0226                  |
| UVC_XPCS_4HR_DN                               | 23 | 1.84 | 0.0256                  |
| BRENTANI_SIGNALING                            | 18 | 1.83 | 0.0278                  |
| FLECHNER_KIDNEY_TRANSPLANT_WELL_UP            | 63 | 1.82 | 0.0280                  |
| CMV_ALL_UP                                    | 19 | 1.82 | 0.0282                  |
| UVC_XPCS_ALL_DN                               | 48 | 1.81 | 0.0293                  |
| BRCA_ER_NEG*                                  | 66 | 1.79 | 0.0338                  |
| AGEING_KIDNEY_UP                              | 35 | 1.77 | 0.0360                  |

|                 |     |      |        |
|-----------------|-----|------|--------|
| TARTE_MATURE_PC | 26  | 1.77 | 0.0367 |
| LEE_TCELLS2_UP  | 108 | 1.77 | 0.0370 |
| DIAB_NEPH_DN*   | 39  | 1.77 | 0.0373 |
| DAC_PANC_UP*    | 25  | 1.73 | 0.0474 |

***GA Treated Subjects***

|                |    |      |                   |
|----------------|----|------|-------------------|
| LEE_TCELLS4_UP | 24 | 2.62 | <10 <sup>-4</sup> |
|----------------|----|------|-------------------|

\* Gene sets that have an FDR q-value in both the untreated and IFN $\beta$ -treated subjects

Here, we use gene set enrichment analysis to assess more modest but coordinated and widespread increase in gene expression that correlate with rs17445836<sup>G</sup> (see Supplementary Methods for details). In short, we assessed each treatment group separately: 94 subjects treated with IFN $\beta$ , 82 subjects that are untreated, and 64 subjects treated with GA. In each group, a QTL analysis using an additive model was performed to assess the correlation of rs17445836<sup>G</sup> to each Affymetrix U133 2.0 that met our quality criteria and had an expression level >3. Then, within each of the three patient subgroups, we extracted those probes with a nominal  $P < 0.05$  and promoted these probes to the gene set enrichment analysis (GSEA). The  $\beta$  value of each probe was used as the input parameter for GSEA analysis. For each patient subgroup, a gene set was considered in the analysis only if between 15-200 of its genes had an input  $\beta$  value. Thus, 147 gene sets were considered in the interferon  $\beta$  analysis, 93 gene sets in the untreated analysis, and 223 gene sets in the GA analysis. Supplementary Table 10 lists those genes whose expression correlates with rs17445836<sup>G</sup> in the gene sets that are shared between the untreated and IFN $\beta$  treated subjects

**Supplementary Table 6b. List of genes whose RNA expression correlates with rs17445836<sup>G</sup> in those gene sets which are found to be significant in the analyses of both the untreated and IFN $\beta$  treated subjects.**

| Genes contributing to the assessment of each gene set with an FDR q-value < 0.05 in untreated subjects and in IFN $\beta$ -treated subjects – data from untreated subjects |                          |                         |                         |              |                   |                                   |                   |             |             |                    |                              |                       |                         |             |              |
|----------------------------------------------------------------------------------------------------------------------------------------------------------------------------|--------------------------|-------------------------|-------------------------|--------------|-------------------|-----------------------------------|-------------------|-------------|-------------|--------------------|------------------------------|-----------------------|-------------------------|-------------|--------------|
| TAKEDA_NUP8_HOXA9_10D_UP                                                                                                                                                   | TAKEDA_NUP8_HOXA9_16D_UP | TAKEDA_NUP8_HOXA9_3D_UP | TAKEDA_NUP8_HOXA9_8D_UP | BRCA_E_R_NEG | IFNA_HCMV_6HRS_UP | BOQUE_ST_CD31PLUS_VS_CD31MINUS_UP | RADADEV_A_IFNA_UP | DAC_PANC_UP | DER_IFNB_UP | REOVIRUS_HEK293_UP | RUTELL_A_HEMATOXINS_DCS_DIFF | JISON_SICKLECELL_DIFF | RAS_ONCOGENIC_SIGNATURE | ICHIBA_GVHD | DIAB_NEPH_DN |
| BIRC4BP                                                                                                                                                                    | BIRC4BP                  | BIRC4BP                 | BIRC4BP                 | ADM          | BAZ1A             | AP2S1                             | BST2              | AP4S1       | BST2        | ADM                | AIF1                         | ADM                   | ABCA1                   | ACSL1       | ADM          |
| BTLA                                                                                                                                                                       | BTLA                     | BST2                    | EPST11                  | AIF1         | BIRC4BP           | ATF3                              | EIF2AK2           | BST2        | CEBPD       | ATF3               | AOAH                         | AKR1A1                | CASP1                   | AIF1        | AIF1         |
| CDKN1C                                                                                                                                                                     | EPST11                   | CDKN1C                  | GCH1                    | ARHGAP21     | BST2              | BIRC4BP                           | HLA-E             | CD55        | EIF2AK2     | BST2               | ASAH1                        | ASCC3L1               | CD55                    | ATP1B3      | ALDH3B1      |
| EIF2AK2                                                                                                                                                                    | EREG                     | EIF2AK2                 | GZMB                    | ATF3         | C1ORF38           | BST2                              | IFI44             | CDKN1A      | GMFB        | CD55               | ATP13A3                      | ATF3                  | CSNK1D                  | CASP1       | ATP13A3      |
| EPST11                                                                                                                                                                     | IFI44                    | EPST11                  | HERC5                   | ATP1B3       | CASP1             | CDKN1C                            | IFI44L            | CDKN1C      | HLA-E       | CEBPG              | ATP1B3                       | BLVRA                 | CXCL5                   | CTSS        | BST2         |
| HBS1L                                                                                                                                                                      | IFI44L                   | FLJ11286                | IFI44                   | C1ORF112     | ECGF1             | CTSS                              | IFI6              | DUSP5       | IFI44       | DUSP1              | B4GALT5                      | BST2                  | DLL1                    | CYBB        | CASP1        |
| HERC5                                                                                                                                                                      | IFI6                     | HERC5                   | IFI44L                  | C1ORF38      | GCH1              | DUSP1                             | IFIT2             | IER3        | IFI6        | GADD45A            | C11ORF32                     | CALCOCO2              | DUSP1                   | FGL2        | CD55         |
| IFI44                                                                                                                                                                      | IFIT1                    | IFI44                   | IFI6                    | CASP1        | IFI44L            | FGL2                              | IFITM2            | IFI6        | IFIT2       | IFI44L             | C5AR1                        | CDKN1A                | DUSP5                   | GRN         | CDC14A       |
| IFI44L                                                                                                                                                                     | IFIT2                    | IFI44L                  | IFIH1                   | CCDC93       | IFIT3             | FLJ22662                          | IFITM3            | IFIH1       | IFIT3       | IFIT3              | CASP1                        | CTSL                  | EREG                    | IFIT1       | CDKN1C       |
| IFI6                                                                                                                                                                       | ISG15                    | IFI6                    | IFIT1                   | CD300A       | IFIT5             | GAS7                              | IRF7              | IFIT5       | IFIT5       | IFIT5              | CD300A                       | DYNLT1                | FBXO9                   | IFIT3       | CEBPD        |
| IFIH1                                                                                                                                                                      | LILRB1/LILRA1            | IFIH1                   | IFIT2                   | CD86         | IRF7              | HLA-DRB1                          | ISG15             | IRF7        | ISG15       | IFITM3             | CD55                         | ECGF1                 | FOS                     | IL18BP      | CTNNA1       |
| IFIT1                                                                                                                                                                      | LOC129607                | IFIT1                   | IFIT3                   | CDK2AP1      | ISG15             | ICA1                              | MX1               | MX1         | MX1         | IRF7               | CD84                         | GADD45A               | GTPBP2                  | IRF7        | DPP6         |
| IFIT2                                                                                                                                                                      | LY6E                     | IFIT2                   | IFIT5                   | CEBPG        | MX1               | IER5                              | MX2               | OAS1        | MX2         | ISG15              | CD86                         | HIST2H2A              | IER3                    | ISG15       | DUSP1        |
| IFIT3                                                                                                                                                                      | MX1                      | IFIT3                   | IRF7                    | CORO1C       | MX2               | IFI44                             | OAS1              | OAS2        | OAS1        | MX2                | CDKN1A                       | IFI30                 | LYN                     | ITPK1       | GAB2         |
| IRF7                                                                                                                                                                       | MX2                      | IFIT5                   | ISG15                   | CSTA         | MYD88             | IFI44L                            | PLSCR1            | PLAUR       | OAS2        | OAS1               | CDKN1C                       | IFI44                 | MFSD2                   | NFKBIZ      | GADD45A      |
| ISG15                                                                                                                                                                      | OAS2                     | IGHM                    | ISYNA1                  | CYBB         | OAS1              | IFIH1                             | UBE2L6            | RAB31       | PLAUR       | OAS2               | CEBPD                        | IFIT1                 | MXD1                    | RPAP1       | GLUL         |
| LILRA2                                                                                                                                                                     | OAS3                     | IRF7                    | LY6E                    | DAPK1        | OAS2              | IGLC1                             |                   | SERPINA1    | RBBP4       | PLSCR1             | CTSB                         | IFIT2                 | MYD88                   | S100A8      | GMFB         |
| LILRA5                                                                                                                                                                     | SMPDL3A                  | ISG15                   | MTSS1                   | DNAJC15      | PLSCR1            | IL3RA                             |                   | SLC7A7      |             | RAB3GAP1           | CTSL                         | IFIT3                 | NFKBIZ                  | S100A9      | IGFBP7       |
| LOC129607                                                                                                                                                                  | SOX4                     | LOC129607               | MX1                     | DRAM         | STX11             | ING1                              |                   | SOD2        |             | UBE2L6             | CXCL5                        | JAK2                  | NOLC1                   | TSPAN4      | ING1         |
| LY6E                                                                                                                                                                       |                          | LY6E                    | MX2                     | ECGF1        | UBE2L6            | KLF4                              |                   | SPON1       |             | USP9X              | CYBB                         | KYNU                  | PLAUR                   | TYROBP      | ISG15        |
| MX1                                                                                                                                                                        |                          | MX1                     | OAS1                    | EXT1         | WARS              | LMO2                              |                   | SVIL        |             | ZFHX1B             | DUSP5                        | LAMP2                 | SAT1                    | WARS        | LASS6        |
| MX2                                                                                                                                                                        |                          | MX2                     | OAS2                    | FAM46A       |                   | MAFB                              |                   |             |             | ZFX                | ELL3                         | LILRA2                | SERPINA1                |             | MTSS1        |
| NEXN                                                                                                                                                                       |                          | OAS1                    | OAS3                    | FGL2         |                   | MAP3K8                            |                   |             |             | ZNF264             | EREG                         | LY6E                  | SLC16A3                 |             | NAB1         |
| OAS1                                                                                                                                                                       |                          | OAS2                    | SOX4                    | FNDC3B       |                   | MTSS1                             |                   |             |             |                    | FCN1                         | MX1                   | SLC25A37                |             | OAS1         |
| OAS2                                                                                                                                                                       |                          | OAS3                    |                         | FUT4         |                   | MX1                               |                   |             |             |                    | FLJ2027                      | NAB1                  | TCF7L2                  |             | OAS2         |



|      |         |          |         |   |         |         |       |        |
|------|---------|----------|---------|---|---------|---------|-------|--------|
| OAS3 | PARP9   | GALNT3   | MX2     | 3 | FTH1    | NUCB1   | TIMP1 | PLSCR1 |
| SOX4 | PLSCR1  | GCH1     | PECAM1  |   | HDAC9   | PLEK    |       | PTGER4 |
|      | PRIC285 | GSTP1    | PFKFB3  |   | HLA-E   | RPL19   |       | RBBP4  |
|      | SOX4    | GZMB     | PRG1    |   | IER5    | SNN     |       | SCRN1  |
|      |         | IFI30    | PRG4    |   | IFI6    | ST3GAL5 |       | TOP2B  |
|      |         | IFI44    | PTGER4  |   | IFITM2  | TCF3    |       | UBE2L6 |
|      |         | KYNU     | RHOB    |   | IGFBP7  | TIMP1   |       | USP9X  |
|      |         | LAMP2    | SEC14L1 |   | ITPK1   | TOP2B   |       | WARS   |
|      |         | LAP3     | SH2B3   |   | KYNU    | TRAF5   |       |        |
|      |         | LGALS9   | SLC16A3 |   | LAMP2   | UBE2L6  |       |        |
|      |         | LYN      | SLC7A1  |   | LASS6   | USP9X   |       |        |
|      |         | MARCKS   | SMAD1   |   | LGALS3  |         |       |        |
|      |         | MX2      | SOD2    |   | /GALIG  |         |       |        |
|      |         | OAS2     | SOX4    |   | LILRA2  |         |       |        |
|      |         | PARVB    | SPTBN1  |   | LILRB2  |         |       |        |
|      |         | PITRM1   | SSH1    |   | LMO2    |         |       |        |
|      |         | PLAUR    | STX11   |   | MAFB    |         |       |        |
|      |         | PLEK     | WARS    |   | MARCKS  |         |       |        |
|      |         | PLSCR1   |         |   | MX2     |         |       |        |
|      |         | PRG1     |         |   | MYD88   |         |       |        |
|      |         | PRIM2A   |         |   | PECAM1  |         |       |        |
|      |         | S100A8   |         |   | PKNOX1  |         |       |        |
|      |         | S100A9   |         |   | PLSCR1  |         |       |        |
|      |         | SACS     |         |   | RAB20   |         |       |        |
|      |         | SLC15A3  |         |   | RAB3GA  |         |       |        |
|      |         | SLC16A3  |         |   | P1      |         |       |        |
|      |         | SLC25A3  |         |   | RAMP1   |         |       |        |
|      |         | 7        |         |   | S100A9  |         |       |        |
|      |         | SLC7A1   |         |   | SCARB2  |         |       |        |
|      |         | SLC7A7   |         |   | SCO2    |         |       |        |
|      |         | SNN      |         |   | SLC16A5 |         |       |        |
|      |         | SOD2     |         |   | SLC30A1 |         |       |        |
|      |         | SSR1     |         |   | SLC7A7  |         |       |        |
|      |         | TGFBI    |         |   | SOD2    |         |       |        |
|      |         | TMEM140  |         |   | STK17A  |         |       |        |
|      |         | TNFSF13B |         |   | TCF3    |         |       |        |
|      |         | TYROBP   |         |   | TCF7L2  |         |       |        |
|      |         | WARS     |         |   | TRAF3   |         |       |        |
|      |         |          |         |   | TRAF5   |         |       |        |

| Genes contributing to the assessment of each gene set with an FDR q-value < 0.05 in untreated subjects and in IFN $\beta$ -treated subjects – data from IFN $\beta$ -treated subjects |                           |                          |                          |              |                                  |                     |                  |              |              |                     |                               |                         |                            |             |               |
|---------------------------------------------------------------------------------------------------------------------------------------------------------------------------------------|---------------------------|--------------------------|--------------------------|--------------|----------------------------------|---------------------|------------------|--------------|--------------|---------------------|-------------------------------|-------------------------|----------------------------|-------------|---------------|
| TAKEDA_NUP8_HOXA9_10D_UP                                                                                                                                                              | TAKED_A_NUP8_HOXA9_16D_UP | TAKED_A_NUP8_HOXA9_3D_UP | TAKED_A_NUP8_HOXA9_8D_UP | BRCA_E_R_NEG | BOQUEST_CD31PLUS_VS_CD31MINUS_UP | IFNA_H_CMV_6H_RS_UP | RADAE_VA_IFNA_UP | DAC_PA_NC_UP | DER_IF_NB_UP | REOVIR_US_HEK293_UP | RUTELL_A_HEM_ATOGF_SNDCS_DIFF | JISON_SICKLE_CELL_D_1FF | RAS_O_NCOGE_NIC_SIG_NATURE | ICHIBA_GVHD | DIAB_N_EPH_DN |
| APOL6                                                                                                                                                                                 | BIRC4B_P                  | BIRC4B_P                 | ABCB1                    | AIM1         | ALCAM                            | BIRC4B_P            | ADAR             | ADRBK1       | ADAR         | AKAP10              | AKR1B1                        | ANP32B                  | ARHGAP27                   | AIM1        | ABI1          |
| BIRC4BP                                                                                                                                                                               | FN1                       | C17ORF27                 | BIRC4B_P                 | AKR1B1       | BIRC4B_P                         | IFIT5               | BCL2             | BARD1        | BTG1         | CDC27               | ASAH1                         | ARHGEF7                 | CCNL1                      | AKAP9       | ACBD3         |
| EIF2AK2                                                                                                                                                                               | IFI44                     | CUGBP2                   | C17ORF27                 | AMD1         | BTG2                             | IRF7                | E2F2             | CD74         | CASP8        | DUSP1               | ASMTL                         | BTF3                    | DUSP1                      | APBB1P      | ADD3          |
| FAM55C                                                                                                                                                                                | IFI6                      | EIF2AK2                  | HERC5                    | BIRC2        | CCNL1                            | MX2                 | EIF2AK2          | ENOSF1       | CD164        | FUS                 | BTG1                          | BTG1                    | EDG4                       | BTG2        | AKAP10        |
| FN1                                                                                                                                                                                   | IFIT1                     | FLJ11286                 | IFI44                    | CARHP1       | CD44                             | PLSCR1              | HLA-B            | FOXO3A       | EIF2AK2      | IFIT5               | C12ORF4                       | COX11                   | EHD1                       | CASP6       | ARL1          |
| HERC5                                                                                                                                                                                 | LILRB1 /// LILRA1         | HERC5                    | IFI6                     | CD44         | CD74                             | PML                 | IFI44            | FSCN1        | GMFB         | IFITM3              | CCNI                          | CUL1                    | FBXO9                      | CD74        | BIRC2         |
| IFI44                                                                                                                                                                                 | LOC129607                 | IFI44                    | IFIH1                    | CD74         | CUGBP2                           | PSCD1               | IFI6             | HERC3        | HLA-B        | IRF7                | CCNL1                         | DGKA                    | FLJ43663                   | ELAC2       | CAPN2         |
| IFI6                                                                                                                                                                                  | MCOLN2                    | IFI6                     | IFIT1                    | CDKN2C       | DUSP1                            | RABGAP1L            | IFITM2           | HLA-G        | IFI44        | ISGF3G              | CD47                          | DYNLT1                  | FN1                        | FAS         | CD164         |
| IFIH1                                                                                                                                                                                 | MPP7                      | IFIH1                    | IFIT5                    | CMPK         | EDNRB                            | RSAD2               | IFITM3           | IFI6         | IFI6         | KIAA0256            | CRIM1                         | EDG4                    | GTPBP2                     | FLOT1       | CD47          |
| IFIT1                                                                                                                                                                                 | MX2                       | IFIT1                    | IRF7                     | CNIH4        | ENG                              | SAMHD1              | IRF7             | IFIH1        | IFIT5        | LOC56902            | CUGBP2                        | EEF1A1                  | HNRPH1                     | IFIT1       | CDC14A        |
| IRF7                                                                                                                                                                                  | NEGR1                     | IFIT5                    | MAP7                     | CUGBP2       | FLJ43663                         | STAT1               | MX2              | IFIT5        | MX2          | LSM5                | EIF2S1                        | EEF2                    | LGALS8                     | IRF7        | CITED2        |
| LOC129607                                                                                                                                                                             | OAS3                      | IRF7                     | MX2                      | DNM1L        | FLT1                             | TDRD7               | PLSCR1           | IRF7         | PML          | MAP4K5              | EPB41L3                       | EIF3S12                 | LRRFIP1                    | LAPTM5      | CRI1          |
| MCOLN2                                                                                                                                                                                | RSAD2                     | ISGF3G                   | MYCN                     | EML4         | FN1                              | TREX1               | RSAD2            | LAPTM5       | PPP3CA       | MX2                 | FLJ20273                      | EIF4A2                  | MCL1                       | LCP2        | CRIM1         |
| MX2                                                                                                                                                                                   | SAMHD1                    | LOC129607                | NEGR1                    | FBL          | GFOD1                            | TRIM21              | SOCS1            | LGP2         | PTPN11       | PFDN4               | FSCN1                         | FBL                     | MFSD2                      | LPHN1       | DNAJA1        |
| NEGR1                                                                                                                                                                                 | SOX4                      | MAP7                     | OAS3                     | FSCN1        | GLS                              | TRIM22              | STAT1            | NCOR2        | PYHIN1       | PLSCR1              | GLS                           | FN1                     | PIAS1                      | MARVELD1    | DNM1L         |
| OAS3                                                                                                                                                                                  |                           | MX2                      | RSAD2                    | FUS          | HLA-B                            |                     | UBE2D3           | PAEP         | STAT1        | PML                 | GPD2                          | GLS                     | PIK3CD                     | NCOA3       | DUSP1         |
| RSAD2                                                                                                                                                                                 |                           | MYCN                     | SOX4                     | GALNT3       | HLA-C                            |                     | VAT1             | PAK2         | TMEM1        | RAB3GAP1            | GTF3A                         | HLCS                    | PRSS1                      | OSBP5       | EXOC7         |
| SOX4                                                                                                                                                                                  |                           | NCOA7                    | STAT1                    | GFOD1        | HLA-DRB1                         |                     |                  | PML          | TRIM21       | RAB5A               | HADHA                         | HNRPH1                  | RAPH1                      | RPAP1       | GLUL          |
| SP110                                                                                                                                                                                 |                           | NEGR1                    |                          | GLS          | HLA-F                            |                     |                  | PSAT1        | TRIM22       | RSAD2               | IFI6                          | IFI44                   | RUNX1                      | RPL22       | GMFB          |
| STAT1                                                                                                                                                                                 |                           | OAS3                     |                          | GMPS         | HSPA6                            |                     |                  | RCN3         | XRCC6        | SAMHD1              | IFITM2                        | IFIT1                   | SAT1                       | SAMHD1      | LASS6         |
|                                                                                                                                                                                       |                           | PARP12                   |                          | GOLT1B       | IFI44                            |                     |                  | SLC16A4      |              | STAT1               | IL18                          | IFNAR2                  | SOCS1                      | SOCS1       | MRCL3         |

|        |                      |              |       |        |              |             |        |        |              |
|--------|----------------------|--------------|-------|--------|--------------|-------------|--------|--------|--------------|
| PARP14 | HLA-F                | IFIH1        | SPON1 | TDRD7  | IL1R2        | IMPDH2      | TBX3   | SPTLC2 | NPTN         |
| PARP9  | HMGA1                | ITGA4        | SVIL  | TLK1   | ITGA4        | JAK1        | TCF7L2 | STAT1  | PCID1        |
| PLSCR1 | IFI44                | KLF4         | TAP2  | TRIM21 | JAK1         | NAP1L1      | TIA1   | TAP2   | PLSCR1       |
| RAD50  | IFNAR2               | LAPTM5       | ULK2  | TRIM22 | KIAA0922     | NPM1        | TRIM22 | TAPBP  | PTPN11       |
| RSAD2  | IL1R2                | LCP2         |       | WEE1   | LASS6        | OGT         |        | UBAP2L | RABGA<br>P1L |
| SOX4   | IRF5                 | LRMP         |       | ZF     | LOC93349     | PSMB2       |        | UBE1L  | SET          |
| SP110  | KIAA0922             | MARS         |       | ZFX    | LRMP         | PTPRM       |        |        | SMARC<br>C1  |
| STAT1  | LAP3                 | MX2          |       | ZNF264 | MCL1         | RASGR<br>P2 |        |        | STAT1        |
| TRIM22 | LAPTM5               | PGS1         |       |        | METTL9       | RBBP6       |        |        | TAPBP        |
|        | LCP2                 | PSAT1        |       |        | MX2          | RPL21       |        |        | TLK1         |
|        | LOC56902             | PSCD1        |       |        | NCOA3        | RPL22       |        |        | TMED5        |
|        | MRPL37               | PTPRM        |       |        | NFATC2<br>IP | RPL37       |        |        | TRIM22       |
|        | MX2                  | RABGA<br>P1L |       |        | NKTR         | RPL4        |        |        | UBR2         |
|        | NCK1                 | SAMHD<br>1   |       |        | NOTCH2       | RPL5        |        |        | ULK2         |
|        | NMB                  | SCARF1       |       |        | PACSIN<br>2  | RPL7        |        |        | UNG          |
|        | PHACTR<br>2          | SEC14L<br>1  |       |        | PGS1         | RPL9        |        |        | YWHAZ        |
|        | PLSCR1               | SH2B3        |       |        | PIGP         | RPS27A      |        |        |              |
|        | PSAT1                | SHMT2        |       |        | PKNOX1       | RPS7        |        |        |              |
|        | PSCD1                | SLC43A<br>1  |       |        | PLOD3        | RSAD2       |        |        |              |
|        | PSCD4                | SOX4         |       |        | PLSCR1       | RSU1        |        |        |              |
|        | PSMB2                | SPTLC2       |       |        | PRKCB1       | SET         |        |        |              |
|        | PTPLB                | SSH1         |       |        | PSCD1        | SFRS5       |        |        |              |
|        | RASGR<br>P2          | TMEM70       |       |        | RAB3GA<br>P1 | SMC5        |        |        |              |
|        | RIOK3                | ZBTB16       |       |        | RAB8B        | SNN         |        |        |              |
|        | RP6-<br>213H19.<br>1 |              |       |        | RASGR<br>P2  | SPTLC2      |        |        |              |
|        | RSAD2                |              |       |        | RNASSET<br>2 | STAT1       |        |        |              |

|  |  |  |  |         |  |  |  |  |  |         |       |  |  |  |
|--|--|--|--|---------|--|--|--|--|--|---------|-------|--|--|--|
|  |  |  |  | RSU1    |  |  |  |  |  | RPL22   | TDRD7 |  |  |  |
|  |  |  |  | SAMD4A  |  |  |  |  |  | RPL5    | UNG   |  |  |  |
|  |  |  |  | SAMHD1  |  |  |  |  |  | RSAD2   | VRK2  |  |  |  |
|  |  |  |  | SNN     |  |  |  |  |  | RUNX1   | YWHAH |  |  |  |
|  |  |  |  | SSR1    |  |  |  |  |  | SCARB2  |       |  |  |  |
|  |  |  |  | STAT1   |  |  |  |  |  | SEPHS1  |       |  |  |  |
|  |  |  |  | STEAP3  |  |  |  |  |  | SMARCC1 |       |  |  |  |
|  |  |  |  | SYNCRIP |  |  |  |  |  | SP110   |       |  |  |  |
|  |  |  |  | TANK    |  |  |  |  |  | SPTLC2  |       |  |  |  |
|  |  |  |  | TFDP1   |  |  |  |  |  | STAT1   |       |  |  |  |
|  |  |  |  | TIA1    |  |  |  |  |  | TCF7L2  |       |  |  |  |
|  |  |  |  | TRIM22  |  |  |  |  |  | TEGT    |       |  |  |  |
|  |  |  |  | UCL3    |  |  |  |  |  | TIA1    |       |  |  |  |
|  |  |  |  | USP13   |  |  |  |  |  | TLR1    |       |  |  |  |
|  |  |  |  | VRK2    |  |  |  |  |  | TM9SF4  |       |  |  |  |
|  |  |  |  | WDR43   |  |  |  |  |  | TMEM97  |       |  |  |  |
|  |  |  |  | XRN1    |  |  |  |  |  | TNFAIP8 |       |  |  |  |
|  |  |  |  | ZNF313  |  |  |  |  |  | UBAP2L  |       |  |  |  |
|  |  |  |  | ZNF777  |  |  |  |  |  | VAT1    |       |  |  |  |
|  |  |  |  |         |  |  |  |  |  | VDR     |       |  |  |  |

**Supplementary Table 7. Analysis of the replication data using logistic regression with an additive model for genotype effect and with gender and country of origin (US or UK) included as covariates.**

| Chr | SNP        | Position (bp) | P <sub>gender</sub>     | P <sub>replication</sub> | Genes                                       |
|-----|------------|---------------|-------------------------|--------------------------|---------------------------------------------|
| 6   | rs3135388  | 32521029      | 2.0 x 10 <sup>-56</sup> | 7.35 x 10 <sup>-75</sup> | <i>HLA DRB1</i>                             |
| 6   | rs2523393  | 29813638      | 7.7 x 10 <sup>-7</sup>  | 3.26 x 10 <sup>-8</sup>  | <i>HLA B</i>                                |
| 12  | rs1800693  | 6310270       | 1.0 x 10 <sup>-5</sup>  | 2.77 x 10 <sup>-5</sup>  | <i>TNFRSF1A</i>                             |
| 16  | rs17445836 | 84575164      | 0.0002                  | 3.03 x 10 <sup>-5</sup>  | <i>IRF8</i>                                 |
| 2   | rs882300   | 136692725     | 0.0002                  | 7.23 x 10 <sup>-5</sup>  | <i>CXCR4</i>                                |
| 1   | rs2300747  | 116905738     | 2.1 x 10 <sup>-5</sup>  | 1.55 x 10 <sup>-4</sup>  | <i>CD58,IGSF3</i>                           |
| 12  | rs4149576  | 6319376       | 0.0001                  | 3.22 x 10 <sup>-4</sup>  | <i>TNFRSF1A</i>                             |
| 1   | rs10735781 | 92893695      | 0.0028                  | 0.0012                   | <i>EVI5</i>                                 |
| 11  | rs17824933 | 60517188      | 0.0126                  | 0.0013                   | <i>TMEM132A,SLC15A3,CD6</i>                 |
| 1   | rs12025416 | 116839810     | 0.0001                  | 0.0013                   | <i>CD58</i>                                 |
| 16  | rs1401884  | 84571052      | 0.009                   | 0.0014                   | <i>IRF8</i>                                 |
| 10  | rs7089861  | 6150332       | 0.0019                  | 0.0020                   | <i>IL2RA,RBM17</i>                          |
| 16  | rs12708716 | 11087374      | 0.0016                  | 0.0021                   | <i>CLEC16A</i>                              |
| 16  | rs11640138 | 11270230      | 0.0041                  | 0.0027                   | <i>SOCS1,TNP2,PRM3,PRM2,PRM1</i>            |
| 16  | rs11865121 | 11074189      | 0.004                   | 0.0037                   | <i>CLEC16A</i>                              |
| 16  | rs7184083  | 11135415      | 0.0247                  | 0.0037                   | <i>CLEC16A</i>                              |
| 10  | rs2104286  | 6139051       | 0.0084                  | 0.0050                   | <i>IL2RA,RBM17</i>                          |
| 6   | rs9321619  | 137916101     | 0.0096                  | 0.0053                   | <i>OLIG3</i>                                |
| 16  | rs11860603 | 11072518      | 0.0061                  | 0.0058                   | <i>CLEC16A</i>                              |
| 13  | rs9586741  | 104537871     | 0.015                   | 0.0096                   | NA                                          |
| 7   | rs2214935  | 22261885      | 0.0106                  | 0.0110                   | <i>RAPGEF5</i>                              |
| 3   | rs4680534  | 161181639     | 0.0268                  | 0.0129                   | <i>IL12A</i>                                |
| 12  | rs7137953  | 119379068     | 0.0079                  | 0.0147                   | <i>COX6A1,TRIAP1,GATC,SFRS9,DYNLL1,COQ5</i> |
| 10  | rs1250540  | 80706013      | 0.0508                  | 0.0151                   | <i>ZMIZ1</i>                                |
| 1   | rs2760524  | 190797171     | 0.014                   | 0.0153                   | <i>RGS1</i>                                 |
| 16  | rs1376041  | 56247384      | 0.0168                  | 0.0154                   | <i>GPR56,GPR97,CCDC135</i>                  |
| 3   | rs7622984  | 30183339      | 0.0674                  | 0.0179                   | NA                                          |
| 5   | rs6897932  | 35910332      | 0.0115                  | 0.0180                   | <i>SPEF2,IL7R,CAPSL</i>                     |
| 6   | rs17066096 | 137494601     | 0.0355                  | 0.0182                   | <i>IL22RA2</i>                              |
| 12  | rs7311897  | 8911595       | 0.0106                  | 0.0200                   | <i>A2ML1,PHC1</i>                           |
| 10  | rs10822550 | 66863143      | 0.0157                  | 0.0207                   | NA                                          |
| 1   | rs11811702 | 33122770      | 0.0222                  | 0.0215                   | <i>S100PBP,FNDC5,HPCA,TMEM54,RNF19B</i>     |
| 15  | rs16971851 | 31599801      | 0.047                   | 0.0239                   | <i>RYR3</i>                                 |
| 1   | rs11165441 | 91996935      | 0.0246                  | 0.0240                   | <i>TGFBR3</i>                               |
| 5   | rs6896969  | 40460183      | 0.0264                  | 0.0324                   | <i>PTGER4</i>                               |
| 6   | rs892999   | 138180398     | 0.0091                  | 0.0327                   | <i>TNFAIP3</i>                              |
| 22  | rs11704699 | 16150181      | 0.185                   | 0.0375                   | NA                                          |
| 7   | rs17280766 | 13603894      | 0.0243                  | 0.0389                   | NA                                          |
| 2   | rs4606981  | 133044646     | 0.0564                  | 0.0468                   | <i>GPR39</i>                                |
| 17  | rs4239162  | 43110809      | 0.0802                  | 0.0484                   | <i>NPEPPS,KPNB1,TBKBP1,TBX21</i>            |
| 12  | rs1790100  | 122222678     | 0.0801                  | 0.0495                   | <i>MPHOSPH9</i>                             |
| 5   | rs4976682  | 176658608     | 0.1159                  | 0.0532                   | <i>NSD1,RAB24,PRELID1,MXD3,LMAN2,RGS14</i>  |
| 22  | rs9621545  | 31451988      | 0.0791                  | 0.0551                   | <i>SYN3</i>                                 |
| 10  | rs11256497 | 6127800       | 0.0641                  | 0.0552                   | <i>IL2RA,RBM17</i>                          |
| 2   | rs10191601 | 204163615     | 0.0381                  | 0.0555                   | <i>RAPH1</i>                                |
| 11  | rs655763   | 108682027     | 0.0534                  | 0.0582                   | NA                                          |
| 1   | rs11164814 | 93033961      | 0.1111                  | 0.0596                   | <i>EVI5,RPL5,FAM69A</i>                     |
| 2   | rs4668486  | 16160643      | 0.1668                  | 0.0630                   | NA                                          |
| 12  | rs2049114  | 122223291     | 0.1102                  | 0.0659                   | <i>MPHOSPH9</i>                             |
| 2   | rs10803554 | 137602666     | 0.1289                  | 0.0777                   | <i>THSD7B</i>                               |

|    |            |           |        |        |                                                  |
|----|------------|-----------|--------|--------|--------------------------------------------------|
| 8  | rs4150894  | 86292120  | 0.1046 | 0.0802 | <i>LRRCC1,E2F5,C8orf59,CA13</i>                  |
| 16 | rs17765606 | 64540948  | 0.0791 | 0.0832 | NA                                               |
| 17 | rs3794716  | 78152456  | 0.0704 | 0.0883 | <i>FOXK2,WDR45L,RAB40B</i>                       |
| 17 | rs9901869  | 42930205  | 0.2112 | 0.0895 | <i>C17orf57,NPEPPS</i>                           |
| 15 | rs12913890 | 58944903  | 0.3529 | 0.0942 | <i>RORA</i>                                      |
| 16 | rs9924445  | 85304319  | 0.2685 | 0.0989 | NA                                               |
| 2  | rs6732091  | 204220071 | 0.0609 | 0.0994 | <i>CD28</i>                                      |
| 9  | rs2492853  | 90021744  | 0.1954 | 0.1003 | NA                                               |
| 6  | rs6926566  | 112190592 | 0.1838 | 0.1012 | <i>FYN</i>                                       |
| 2  | rs1404773  | 215847577 | 0.8808 | 0.1045 | <i>ATIC</i>                                      |
| 4  | rs1880719  | 83836459  | 0.1447 | 0.1050 | <i>SCD5</i>                                      |
| 1  | rs1182580  | 104248305 | 0.3191 | 0.1119 | NA                                               |
| 20 | rs6131888  | 16925054  | 0.1793 | 0.1179 | NA                                               |
| 22 | rs741195   | 19323766  | 0.1901 | 0.1188 | <i>MED15</i>                                     |
| 17 | rs7217180  | 54979905  | 0.1666 | 0.1212 | <i>DHX40</i>                                     |
| 1  | rs7517186  | 41676608  | 0.2801 | 0.1309 | <i>EDN2</i>                                      |
| 9  | rs2236293  | 35831783  | 0.1175 | 0.1350 | <i>NPR2,SPAG8,HINT2,C9orf128,C9orf127,OR13J1</i> |
| 21 | rs876498   | 42714896  | 0.1571 | 0.1362 | <i>TFF1,TMPRSS3,UBASH3A,RSPH1</i>                |
| 14 | rs4468527  | 51394881  | 0.0961 | 0.1387 | <i>GNG2</i>                                      |
| 19 | rs2303759  | 54560863  | 0.2207 | 0.1420 | <i>SLC6A16,CD37,TEAD2,DKKL1,FLJ32658,PTH2</i>    |
| 5  | rs931555   | 35839334  | 0.1074 | 0.1440 | <i>SPEF2,IL7R</i>                                |
| 18 | rs763361   | 65682622  | 0.2864 | 0.1475 | <i>DOK6,CD226</i>                                |
| 16 | rs1035946  | 24881927  | 0.156  | 0.1633 | <i>SLC5A11,ARHGAP17</i>                          |
| 5  | rs1838724  | 53277764  | 0.0918 | 0.1667 | <i>ARL15</i>                                     |
| 21 | rs2839578  | 43025706  | 0.323  | 0.1696 | <i>PDE9A</i>                                     |
| 11 | rs10892613 | 120063294 | 0.4397 | 0.1751 | <i>GRIK4</i>                                     |
| 17 | rs4792311  | 12855734  | 0.2075 | 0.1810 | <i>RICH2,ELAC2</i>                               |
| 4  | rs11736632 | 56867092  | 0.3308 | 0.1860 | <i>KIAA1211,AASDH</i>                            |
| 2  | rs616582   | 111658466 | 0.5956 | 0.2064 | <i>BCL2L11</i>                                   |
| 1  | rs8192284  | 152693594 | 0.1964 | 0.2095 | <i>IL6R,SHE,TDRD10</i>                           |
| 15 | rs17304143 | 60364343  | 0.3947 | 0.2097 | NA                                               |
| 5  | rs395561   | 106889874 | 0.4554 | 0.2114 | <i>EFNA5</i>                                     |
| 17 | rs17581498 | 71305642  | 0.3105 | 0.2206 | <i>ITGB4,GALK1,H3F3B,UNK,UNC13D,WBP2</i>         |
| 18 | rs7232625  | 59106929  | 0.2248 | 0.2238 | <i>BCL2,FVT1</i>                                 |
| 7  | rs10244467 | 22777741  | 0.116  | 0.2282 | <i>IL6,TOMM7</i>                                 |
| 17 | rs2304494  | 37216477  | 0.1968 | 0.2282 | <i>JUP,SC65,FKBP10,NT5C3L,KLHL10,KLHL11</i>      |
| 5  | rs10454951 | 6305863   | 0.2637 | 0.2284 | <i>FLJ33360</i>                                  |
| 15 | rs16967121 | 36710299  | 0.0799 | 0.2342 | NA                                               |
| 7  | rs11772925 | 150059042 | 0.4273 | 0.2588 | <i>GIMAP2,GIMAP1,GIMAP5</i>                      |
| 8  | rs7814314  | 136905069 | 0.345  | 0.2628 | NA                                               |
| 16 | rs9940149  | 240642    | 0.3543 | 0.2923 | <i>LUC7L,ITFG3,RGS11,ARHGDIG,PDIA2,AXIN1</i>     |
| 19 | rs918434   | 52452069  | 0.2339 | 0.2977 | <i>SAE1,BBC3,CCDC9,C5AR1</i>                     |
| 10 | rs1914184  | 63870389  | 0.7591 | 0.2987 | <i>ZNF365</i>                                    |
| 6  | rs352074   | 114323639 | 0.558  | 0.3014 | <i>MARCKS,HDAC2</i>                              |
| 15 | rs3816800  | 23476187  | 0.3403 | 0.3088 | <i>ATP10A</i>                                    |
| 11 | rs1699105  | 120947829 | 0.3065 | 0.3237 | <i>SORL1</i>                                     |
| 2  | rs12999011 | 190213032 | 0.6717 | 0.3237 | <i>SLC40A1,ASNSD1,ANKAR</i>                      |
| 13 | rs201763   | 49917022  | 0.2395 | 0.3293 | NA                                               |
| 2  | rs7574456  | 136606529 | 0.365  | 0.3558 | <i>CXCR4</i>                                     |
| 5  | rs17346755 | 58000989  | 0.1984 | 0.3560 | <i>RAB3C</i>                                     |
| 17 | rs11658169 | 19812514  | 0.3877 | 0.3567 | <i>AKAP10</i>                                    |
| 19 | rs34536443 | 10324118  | 0.1616 | 0.3608 |                                                  |
| 22 | rs135382   | 47176626  | 0.374  | 0.3739 | NA                                               |
| 1  | rs6691787  | 68179214  | 0.741  | 0.3743 | NA                                               |

|    |            |           |        |        |                                  |
|----|------------|-----------|--------|--------|----------------------------------|
| 16 | rs251921   | 13110329  | 0.2696 | 0.3861 | NA                               |
| 2  | rs4668993  | 15869752  | 0.8993 | 0.3935 | NA                               |
| 3  | rs711663   | 4437774   | 0.6205 | 0.3951 | SUMF1                            |
| 10 | rs12260682 | 126644390 | 0.6035 | 0.3977 | ZRANB1,CTBP2                     |
| 6  | rs6910219  | 33570006  | 0.7558 | 0.4006 | SYNGAP1,ZBTB9                    |
| 5  | rs432482   | 96513963  | 0.2999 | 0.4236 |                                  |
| 4  | rs17086658 | 56864663  | 0.7799 | 0.4311 | KIAA1211,AASDH                   |
| 13 | rs9516129  | 92191496  | 0.2214 | 0.4346 | GPC5                             |
| 5  | rs158968   | 57977726  | 0.574  | 0.4382 | RAB3C                            |
| 6  | rs9347662  | 162896005 | 0.5577 | 0.4522 | PARK2                            |
| 1  | rs1294012  | 9207768   | 0.23   | 0.4658 | H6PD                             |
| 4  | rs2726453  | 106539285 | 0.3854 | 0.4678 | PPA2                             |
| 3  | rs1356122  | 155666256 | 0.257  | 0.4680 | GPR149                           |
| 1  | rs11580092 | 58606614  | 0.6505 | 0.4702 | NA                               |
| 18 | rs426921   | 63402133  | 0.4009 | 0.4712 | NA                               |
| 2  | rs2357954  | 54215941  | 0.6477 | 0.4712 | ACYP2                            |
| 16 | rs10775336 | 56103237  | 0.5748 | 0.4772 | COQ9,POLR2C,DOK4,CCDC102A,GPR114 |
| 17 | rs820240   | 71094622  | 0.6909 | 0.4775 | LLGL2,RECQL5                     |
| 11 | rs11023151 | 14202675  | 0.5659 | 0.4823 | SPON1,RRAS2                      |
| 5  | rs254837   | 158615778 | 0.7926 | 0.4828 | RNF145,UBLCP1,IL12B              |
| 13 | rs9523776  | 92143920  | 0.4338 | 0.4899 | GPC5                             |
| 13 | rs9523762  | 92129887  | 0.6348 | 0.5113 | GPC5                             |
| 8  | rs2277136  | 6322616   | 0.7451 | 0.5334 | ANGPT2,MCPH1                     |
| 9  | rs1658957  | 6662097   | 0.2447 | 0.5444 | GLDC                             |
| 18 | rs17760402 | 53915666  | 0.3727 | 0.5672 | NEDD4L                           |
| 18 | rs154929   | 56968545  | 0.7566 | 0.5691 | NA                               |
| 5  | rs2853694  | 158681666 | 0.7797 | 0.5703 | UBLCP1,IL12B                     |
| 8  | rs2083914  | 6289562   | 0.6271 | 0.5741 | ANGPT2,MCPH1                     |
| 2  | rs1519529  | 136690727 | 0.4878 | 0.5836 | NA                               |
| 8  | rs7814564  | 26835382  | 0.7402 | 0.5849 | ADRA1A                           |
| 8  | rs1611927  | 4586651   | 0.8085 | 0.5989 | CSMD1                            |
| 13 | rs9596270  | 49740441  | 0.3668 | 0.6064 | NA                               |
| 3  | rs187084   | 52236071  | 0.5981 | 0.6111 | ALAS1,TLR9,TWF2,PPM1M,WDR82      |
| 10 | rs479505   | 97350709  | 0.7631 | 0.6171 | SORBS1,ALDH18A1                  |
| 19 | rs1862511  | 6537268   | 0.8995 | 0.6290 | TNFSF9,CD70                      |
| 2  | rs10203141 | 178898543 | 0.7819 | 0.6378 | OSBPL6                           |
| 19 | rs17239559 | 59398234  | 0.6502 | 0.6445 | LILRB3,LILRA6,LILRB5             |
| 15 | rs3814281  | 81296820  | 0.6503 | 0.6551 | FSD2,WHDC1,HOMER2                |
| 11 | rs11604291 | 72680764  | 0.9006 | 0.6714 | P2RY2,P2RY6,ARHGEF17             |
| 1  | rs536858   | 66545614  | 0.8023 | 0.6745 | PDE4B                            |
| 3  | rs6583176  | 198009975 | 0.831  | 0.6816 | PAK2                             |
| 14 | rs1420810  | 86572905  | 0.982  | 0.6868 | NA                               |
| 8  | rs13251655 | 119829740 | 0.624  | 0.6886 | NA                               |
| 16 | rs11643026 | 62173482  | 0.6211 | 0.6888 | NA                               |
| 16 | rs17782451 | 87006977  | 0.4313 | 0.6940 | ZFFM1                            |
| 13 | rs10507622 | 58443686  | 0.8582 | 0.7066 | NA                               |
| 1  | rs12042693 | 165780347 | 0.8765 | 0.7131 | CD247,CREG1                      |
| 8  | rs4368946  | 98497864  | 0.8552 | 0.7457 | NA                               |
| 14 | rs6571751  | 20840570  | 0.7951 | 0.7478 | HNRNPC,RPGRIP1,SUPT16H           |
| 2  | rs1582844  | 153475282 | 0.8056 | 0.7538 | NA                               |
| 13 | rs927544   | 46354052  | 0.8573 | 0.7565 | HTR2A                            |
| 14 | rs2022771  | 85999679  | 0.4218 | 0.7569 | NA                               |
| 12 | rs12300846 | 9634751   | 0.661  | 0.7626 | KLRB1                            |
| 7  | rs6973638  | 15363795  | 0.8043 | 0.7641 | TMEM195                          |

|    |            |           |        |        |                                     |
|----|------------|-----------|--------|--------|-------------------------------------|
| 11 | rs12419184 | 125561518 | 0.6582 | 0.7644 | <i>RPUSD4,FAM118B</i>               |
| 22 | rs4821818  | 37495985  | 0.7286 | 0.7660 | <i>GTPBP1,UNC84B,DNAL4,NPTXR</i>    |
| 3  | rs4678000  | 123373425 | 0.7136 | 0.7818 | <i>CD86,CASR</i>                    |
| 18 | rs10503052 | 57050613  | 0.5091 | 0.7828 | NA                                  |
| 3  | rs1000361  | 27785323  | 0.9998 | 0.7921 | <i>EOMES</i>                        |
| 21 | rs2834044  | 33277432  | 0.6204 | 0.7998 | <i>OLIG2</i>                        |
| 11 | rs11230555 | 60519710  | 0.9445 | 0.8040 | <i>TMEM132A,SLC15A3,CD6</i>         |
| 13 | rs2325566  | 73281941  | 0.2852 | 0.8097 | <i>KLF12</i>                        |
| 21 | rs11088251 | 33692680  | 0.8975 | 0.8105 | <i>IFNAR1,IFNGR2,TMEM50B</i>        |
| 11 | rs750780   | 33874170  | 0.717  | 0.8181 | <i>LMO2</i>                         |
| 3  | rs13073434 | 155593736 | 0.2617 | 0.8336 | <i>GPR149</i>                       |
| 3  | rs12490899 | 30649258  | 0.7625 | 0.8482 | <i>TGFBR2</i>                       |
| 1  | rs4970891  | 144721950 | 0.9826 | 0.8518 | NA                                  |
| 9  | rs4740392  | 132854767 | 0.7091 | 0.8626 | <i>FIBCD1,LAMC3</i>                 |
| 7  | rs1193335  | 127404040 | 0.9802 | 0.8880 | <i>C7orf54,LRRC4,SND1</i>           |
| 19 | rs11667601 | 16531660  | 0.4983 | 0.8940 | <i>C19orf44,CHERP,SLC35E1,MED26</i> |
| 14 | rs17179734 | 71670843  | 0.9322 | 0.8953 | <i>RGS6</i>                         |
| 3  | rs3806680  | 3127384   | 0.925  | 0.9107 | <i>CNTN4,IL5RA,TRNT1,CRBN</i>       |
| 12 | rs7132171  | 38936016  | 0.9954 | 0.9113 | <i>LRRK2</i>                        |
| 4  | rs1017429  | 42808275  | 0.919  | 0.9387 | NA                                  |
| 15 | rs8023613  | 30739485  | 0.9218 | 0.9430 | <i>ARHGAP11A,SCG5,GREM1</i>         |
| 10 | rs10885868 | 117912102 | 0.9129 | 0.9498 | <i>GFRA1</i>                        |
| 9  | rs10815231 | 547015    | 0.6038 | 0.9578 | <i>KANK1</i>                        |
| 14 | rs10148925 | 59157663  | 0.8761 | 0.9616 | <i>RTN1</i>                         |
| 1  | rs1193345  | 17786301  | 0.7223 | 0.9681 | <i>ARHGEF10L</i>                    |
| 17 | rs2293152  | 37735055  | 0.7299 | 0.9721 | <i>STAT5B,STAT5A,STAT3</i>          |
| 12 | rs7314705  | 30090640  | 0.779  | 0.9800 | NA                                  |
| 21 | rs2832359  | 29790149  | 0.9807 | 0.9920 | <i>GRIK1</i>                        |

Genes: All genes found within a segment defined by all SNPs with an  $r^2 > 0.5$  with the reference SNP.

NA: not available - there is no gene found within the segment defined by all SNPs with an  $r^2 > 0.5$  with the reference SNP

N.B. SNPs are ranked by their  $P$  value in the logistic regression model with the gender and country covariates ( $P_{\text{gender}}$ ). The CMH  $P$  values ( $P_{\text{replication}}$ ) from Supplementary Table 4 are included for reference.



## II. Supplementary Figure

**Supplementary Figure 1. LD maps of the three novel MS susceptibility loci. (a) *TNFRSF1A*, (b) *IRF8*, and (c) *CD6*.** Data from HapMap CEU samples were used to prepare each panel. In each panel, the chromosomal segment of interest is outlined at the top of the panel. The physical positions are based on human genome build 36. The genes found within the chromosomal are outlined below the chromosomal segment. The SNPs found in HapMap at a minor allele frequency > 0.05 in CEU samples were used to prepare these plots. The SNP with the most extreme association with MS susceptibility is highlighted with a red arrowhead. Finally, pairwise LD relationships are portrayed using a white (low) to red (high) scale:  $D' < 1$ ,  $LOD < 2$  = white;  $D' = 1$ ,  $LOD < 2$  = blue;  $D' < 1$ ,  $LOD \geq 2$  = shades of pink/red;  $D' = 1$ ,  $LOD \geq 2$  = bright red.

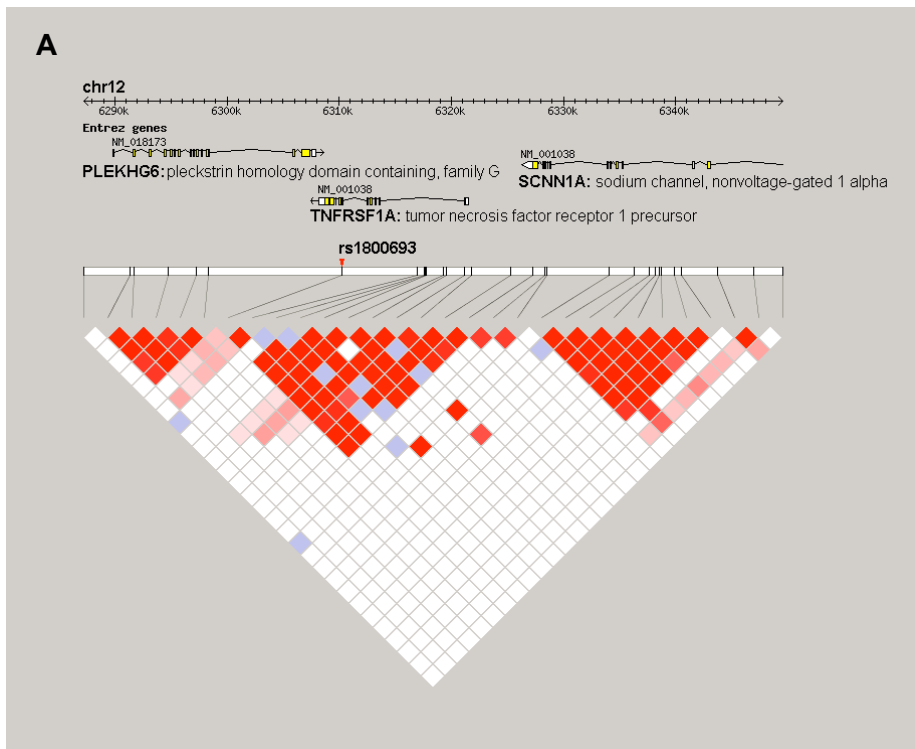

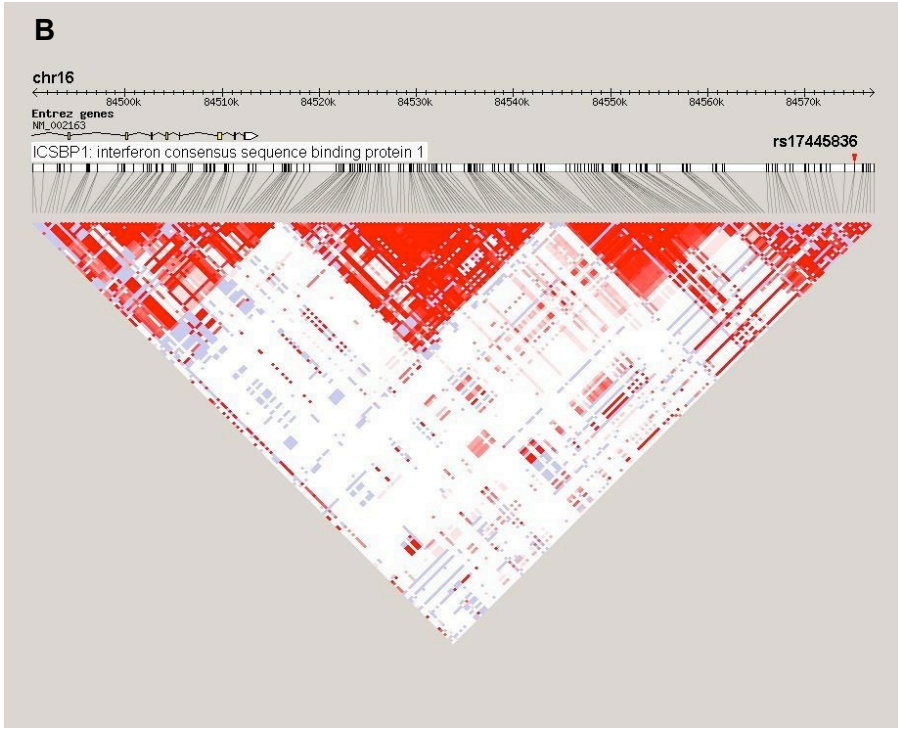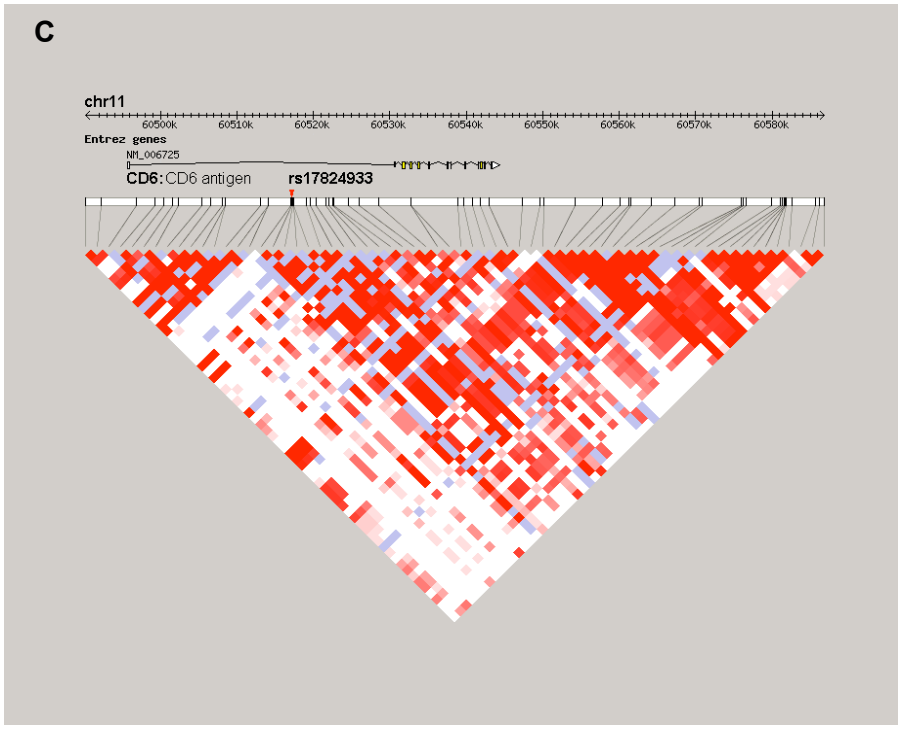

Supplement: NIHMS131042-supplement-Supplement.pdf [file NIHMS131042-supplement-Supplement.pdf]
